# Supplementary material for: Co-developing patient and family engagement indicators for health system improvement with healthcare system stakeholders: a consensus study
Source: PubMed Central journal article supplement — BMJ Open. 2023 Feb 2;13(2):e067609. doi: 10.1136/bmjopen-2022-067609 (PMC9896218; doi:10.1136/bmjopen-2022-067609), 2023-02-02
Supplement: bmjopen-2022-067609.draft_revisions.pdf [file bmjopen-2022-067609.draft_revisions.pdf]

# BMJ Open

BMJ Open is committed to open peer review. As part of this commitment we make the peer review history of every article we publish publicly available.

When an article is published we post the peer reviewers' comments and the authors' responses online. We also post the versions of the paper that were used during peer review. These are the versions that the peer review comments apply to.

The versions of the paper that follow are the versions that were submitted during the peer review process. They are not the versions of record or the final published versions. They should not be cited or distributed as the published version of this manuscript.

BMJ Open is an open access journal and the full, final, typeset and author-corrected version of record of the manuscript is available on our site with no access controls, subscription charges or pay-per-view fees (<http://bmjopen.bmj.com>).

If you have any questions on BMJ Open's open peer review process please email [info.bmjopen@bmj.com](mailto:info.bmjopen@bmj.com)

# BMJ Open

## Co-developing patient and family engagement indicators for health system improvement: A consensus study

|                               |                                                                                                                                                                                                                                                                                                                                                                                                                                                                                                                                                                                                                                                                                                                                                                                                                                                                                                                                                                                                                                                                                                                                                                                                                                            |
|-------------------------------|--------------------------------------------------------------------------------------------------------------------------------------------------------------------------------------------------------------------------------------------------------------------------------------------------------------------------------------------------------------------------------------------------------------------------------------------------------------------------------------------------------------------------------------------------------------------------------------------------------------------------------------------------------------------------------------------------------------------------------------------------------------------------------------------------------------------------------------------------------------------------------------------------------------------------------------------------------------------------------------------------------------------------------------------------------------------------------------------------------------------------------------------------------------------------------------------------------------------------------------------|
| Journal:                      | <i>BMJ Open</i>                                                                                                                                                                                                                                                                                                                                                                                                                                                                                                                                                                                                                                                                                                                                                                                                                                                                                                                                                                                                                                                                                                                                                                                                                            |
| Manuscript ID                 | bmjopen-2022-067609                                                                                                                                                                                                                                                                                                                                                                                                                                                                                                                                                                                                                                                                                                                                                                                                                                                                                                                                                                                                                                                                                                                                                                                                                        |
| Article Type:                 | Original research                                                                                                                                                                                                                                                                                                                                                                                                                                                                                                                                                                                                                                                                                                                                                                                                                                                                                                                                                                                                                                                                                                                                                                                                                          |
| Date Submitted by the Author: | 23-Aug-2022                                                                                                                                                                                                                                                                                                                                                                                                                                                                                                                                                                                                                                                                                                                                                                                                                                                                                                                                                                                                                                                                                                                                                                                                                                |
| Complete List of Authors:     | Santana, Maria-Jose; University of Calgary, Community Health Sciences; Canadian Institutes of Health Research, Alberta Strategy for Patient-Oriented Research (SPOR) SUPPORT Unit<br>Ahmed, Sadia; University of Calgary Cumming School of Medicine, Pediatrics; Canadian Institutes of Health Research, Alberta Strategy for Patient-Oriented Research (SPOR) SUPPORT Unit<br>Fairie, Paul; University of Calgary, Community Health Sciences; Canadian Institutes of Health Research, Alberta Strategy for Patient-Oriented Research (SPOR) SUPPORT Unit<br>Zelinsky, Sandra; University of Calgary, Department of Community Health Sciences; Canadian Institutes of Health Research, Alberta Strategy for Patient-Oriented Research (SPOR) SUPPORT Unit<br>Wilkinson, Gloria; Alberta Health Services, Strategic Clinical Networks<br>McCarron, Tamara; University of Calgary, Community Health Sciences<br>Mork, Mikie; Alberta Health Services, Strategic Clinical Networks<br>Patel, Jatin; Alberta Health Services, Strategic Clinical Networks<br>Wasylak, Tracy; Alberta Health Services, Strategic Clinical Networks™; Canadian Institutes of Health Research, Alberta Strategy for Patient-Oriented Research (SPOR) SUPPORT Unit |
| Keywords:                     | QUALITATIVE RESEARCH, STATISTICS & RESEARCH METHODS, COVID-19                                                                                                                                                                                                                                                                                                                                                                                                                                                                                                                                                                                                                                                                                                                                                                                                                                                                                                                                                                                                                                                                                                                                                                              |
|                               |                                                                                                                                                                                                                                                                                                                                                                                                                                                                                                                                                                                                                                                                                                                                                                                                                                                                                                                                                                                                                                                                                                                                                                                                                                            |

SCHOLARONE™  
Manuscripts

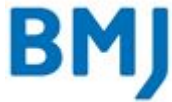

I, the Submitting Author has the right to grant and does grant on behalf of all authors of the Work (as defined in the below author licence), an exclusive licence and/or a non-exclusive licence for contributions from authors who are: i) UK Crown employees; ii) where BMJ has agreed a CC-BY licence shall apply, and/or iii) in accordance with the terms applicable for US Federal Government officers or employees acting as part of their official duties; on a worldwide, perpetual, irrevocable, royalty-free basis to BMJ Publishing Group Ltd ("BMJ") its licensees and where the relevant Journal is co-owned by BMJ to the co-owners of the Journal, to publish the Work in this journal and any other BMJ products and to exploit all rights, as set out in our [licence](#).

The Submitting Author accepts and understands that any supply made under these terms is made by BMJ to the Submitting Author unless you are acting as an employee on behalf of your employer or a postgraduate student of an affiliated institution which is paying any applicable article publishing charge ("APC") for Open Access articles. Where the Submitting Author wishes to make the Work available on an Open Access basis (and intends to pay the relevant APC), the terms of reuse of such Open Access shall be governed by a Creative Commons licence – details of these licences and which [Creative Commons](#) licence will apply to this Work are set out in our licence referred to above.

Other than as permitted in any relevant BMJ Author's Self Archiving Policies, I confirm this Work has not been accepted for publication elsewhere, is not being considered for publication elsewhere and does not duplicate material already published. I confirm all authors consent to publication of this Work and authorise the granting of this licence.

1 Co-developing engagement indicators – *BMJ Open* submission.

2  
3  
4 **Co-developing patient and family engagement indicators for health system improvement: A consensus study**

5  
6  
7 **Author list**

8 Maria J. Santana<sup>1,2,3</sup>, Sadia Ahmed<sup>1,2</sup>, Paul Fairie<sup>2,3</sup>, Sandra Zelinsky<sup>2,3</sup>, Gloria Wilkinson<sup>4</sup>, Tamara L. McCarron<sup>3</sup>, Mikie Mork<sup>4</sup>, Jatin Patel<sup>4</sup>,  
9 Tracy Wasylak<sup>4,5,6</sup>

10  
11  
12  
13 <sup>1</sup>Department of Paediatrics, Cumming School of Medicine, University of Calgary, Calgary, Alberta, Canada

14 <sup>2</sup>Alberta Strategy for Patient-Oriented Research (SPOR) SUPPORT Unit Patient Engagement Team

15 <sup>3</sup>Department of Community Health Sciences, Cumming School of Medicine, University of Calgary, Calgary, Alberta, Canada

16 <sup>4</sup>Strategic Clinical Networks, Alberta Health Services, Calgary, Alberta, Canada

17 <sup>5</sup>Alberta Strategy for Patient-Oriented Research (SPOR) SUPPORT Unit Learning Health System Team

18 <sup>6</sup> Faculty of Nursing, University of Calgary

19  
20  
21  
22  
23  
24  
25 Corresponding author:

26  
27  
28 Dr. Maria J. Santana

29 [mjsantan@ucalgary.ca](mailto:mjsantan@ucalgary.ca)

30  
31  
32  
33  
34  
35 Word Count: 4,452

36  
37  
38 Keywords: patient engagement, surveys and questionnaires, health care systems, patient-oriented research, consensus

39  
40  
41  
42 **Article Summary**

43  
44  
45 **Strengths and limitations**

- 46  
47  
48  
49  
50  
51  
52  
53  
54  
55  
56  
57  
58  
59  
60
- The consensus process utilized a participatory approach, by engaging diverse groups of experienced stakeholders, including patient and community advisors and health system staff and leaders
  - This study used a modified Delphi consensus process to co-develop a set of indicators to measure patient engagement in health research and system transformation for a provincial health system.
  - This particular specific set of indicators has not yet been validated or implemented.

1 Co-developing engagement indicators – *BMJ Open* submission.

2  
3  
4  
5  
6  
7  
8 **Abstract**

9  
10  
11 **Objective** To develop a set of patient and family engagement indicators (PFE-Is) for measuring engagement in health system improvement  
12 for a Canadian provincial health delivery system through an evidence-based consensus approach to ensure the PFE-Is reflect meaningful  
13 patient and family engagement.  
14  
15

16  
17 **Design** This mixed-method, multi-phase project included: (1) identification of existing measures of patient and family engagement through  
18 a review of the literature and consultations with a diverse provincial council of patients, caregivers, community members, and researchers.  
19 The Public and Patient Engagement Evaluation Tool (PPEET) was selected; (2) consultations on relevance, acceptability and importance  
20 with patient and family advisors, and members of Alberta Health Services' Strategic Clinical Networks™. This phase included surveys and  
21 one-on-one semi structured interviews aimed to further explore the use of PPEET in this context. Findings from the survey and interviews  
22 informed the development of the final list of indicators; (3) a Delphi consensus process using a modified RAND/UCLA Appropriateness  
23 Method to identify and refine a core set of PFE-Is.  
24  
25  
26  
27  
28  
29

30 **Participants** The consensus panel consisted of patients, family members, community representatives, clinicians, researchers, and healthcare  
31 leaders.  
32  
33  
34

35 **Results** From an initial list of 33 evidence-based PFE-Is identified, the consensus process yielded 18 final indicators. These PFE-Is were  
36 grouped into seven themes: communication, comfort to contribute, supports needed for engagement, impact and influence of engagement  
37 initiative, diversity of perspectives, respectful engagement, and working together indicators.  
38  
39  
40

41 **Conclusions** This group of final patient, family and stakeholder informed indicators can be used to measure and evaluate meaningful  
42 engagement in health research and system transformation. The use of these metrics can help to improve the quality of patient and family  
43 engagement to drive health research and system transformation.  
44  
45  
46  
47  
48  
49  
50  
51  
52  
53  
54  
55  
56  
57  
58  
59  
60

1 *Co-developing engagement indicators – BMJ Open submission.*

2  
3  
4 **Background**

5  
6  
7 Person-centred health system improvement and transformation requires the involvement of patients and families to shape system priorities  
8 and inform care delivery and outcomes.<sup>(1)</sup> Recent evidence has shown that engaging patients in health system transformation can enhance  
9 service delivery and drive system improvement.<sup>(2)</sup>

10  
11  
12  
13 While there have been efforts to advance patient engagement in health research and health system transformation, there are currently few  
14 co-developed, system-embedded sets of indicators to evaluate patient engagement and its impact on this transformation.

15  
16  
17  
18 Our objective for this project was to address this gap by developing a set of evidence-based patient and family engagement indicators (PFE-  
19 ls) that were informed and prioritized by patient and family advisors (PFAs) in the context of a large and complex fully integrated  
20 provincial health system to measure meaningful patient engagement at the system level.

21  
22  
23  
24 Alberta Health Services (AHS) is the largest province-wide health delivery system authority in the Canadian province of Alberta.<sup>(3)</sup> Within  
25 AHS, the Strategic Clinical Networks™ (SCNs) address system-wide gaps in care, work together to get evidence into practice, improve  
26 patient outcomes and experience, and to support continuous quality improvement.<sup>(4)</sup> The SCNs are multi-stakeholder teams that are  
27 comprised of clinicians, patient and family advisors, operational leaders, researchers, policy makers and community partners.<sup>(4, 5)</sup>

28  
29  
30  
31 As of June 2022, the 11 SCNs aim to advance improvements in specific areas of health: (1) Bone & Joint Health, (2) Cancer, (3) Cardiovascular  
32 Health & Stroke, (4) Critical Care, (5) Diabetes, Obesity & Nutrition, (6) Digestive Health, (7) Emergency, (8) Maternal Newborn Child &  
33 Youth, (9) Medicine, (10) Neurosciences, Rehabilitation & Vision and (11) Surgery; and within 5 Integrated Provincial programs: (1)  
34 Addiction & Mental Health, (2) Seniors & Continuing Care, (3) Primary Health Care, (4) Population and Public Health and (5) Indigenous  
35 Wellness Core.

36  
37  
38  
39 Each SCN works to actively engage patients and families in priority setting and co-designing solutions to improve patient experiences and  
40 quality of care. The Patient Engagement Reference Group (PERG) includes patients and public that engaged regularly in quality  
41 improvement and research projects within the 11 SCNs and the 5 Provincial Integrated Programs.<sup>(6)</sup>

42  
43  
44  
45 We undertook this project to co-develop PFE-ls which represent a key step towards ensuring that healthcare system measures remain  
46 responsive to what matters to patients.

47  
48  
49  
50 **Methods**

51  
52  
53  
54 This mixed method study is a multi-phased patient-oriented research study that was informed by recent literature on patient engagement  
55 in health systems,<sup>(7, 8)</sup> consultations with our provincial network of Albertans (Albertans4HealthResearch Collaborative Council),<sup>(9)</sup> a

1 *Co-developing engagement indicators – BMJ Open submission.*

2  
3  
4 survey and interviews with AHS SCN staff, leadership and PFAs, followed by a modified Delphi consensus generating process<sup>(10)</sup> to identify  
5 indicators to be used by the AHS SCNs to measure patient and family engagement in their initiatives to transform health care system in  
6 Alberta (Figure 1).  
7

### 8 9 10 *Patient and Public Involvement*

11  
12  
13 This study is informed by the Canadian Institutes of Health Research (CIHR) Strategy for Patient-Oriented Research (SPOR) Patient  
14 Engagement Framework, which states that patients are active partners in health research.<sup>(11)</sup> The four guiding principles of the framework  
15 are inclusiveness, support, mutual respect, and co-build.<sup>(11)</sup> We consulted with patients and family advisors with diverse lived experience as  
16 active collaborators through a participatory approach—doing research ‘with’ rather than ‘on’ them.<sup>(11)</sup> The team included two patient  
17 partners, people living with chronic conditions (GW and SZ), both of whom are graduates of the Patient and Community Engagement  
18 Research (PaCER) program<sup>(12)</sup> from the University of Calgary that trains citizens with lived experiences of a health condition how to  
19 conduct research projects by, for, and with patients. GW and SZ also lead patient engagement groups with extensive experience working on  
20 healthcare research and quality improvement projects and at governance level in the healthcare system.<sup>(6, 13)</sup> GW and SZ were involved in  
21 the planning of the project through working with the team members, SCN leadership and PERG to design the rollout of the project,  
22 providing feedback on the study proposal, supporting recruitment of patient and family advisors, co-conducting the project, and co-  
23 developing the manuscript.  
24  
25  
26  
27  
28  
29

### 30 31 **Study participants and recruitment**

32  
33 The study population includes a diverse group of SCN leadership (individuals responsible for the organizational requirements for  
34 engagement activities- Scientific Directors (SD), Senior Provincial Directors (SPD), Senior Provincial Officers (SPO), Senior Medical  
35 Directors (SMD)), SCN Staff (Assistant Scientific Directors (ASD), Executive Directors (ED), Managers, Staff Liaisons, Senior Consultants)  
36 and (PFAs) within the SCNs.  
37  
38  
39

40  
41 Recruitment was supported by members of the research team (GW, MM, JP, and TW), working with and leading the AHS SCNs.  
42 Participants were invited to complete a survey and semi-structured interview. SCN leadership, SCN staff, and PFAs were also invited to  
43 participate in a modified Delphi consensus process.  
44  
45

46  
47 The University of Calgary Conjoint Health Research Ethics Board (CHREB) has approved this project (REB20-1822).  
48  
49

### 50 **Patient and public involvement: A multi-phase approach**

51  
52  
53 The development of these indicators occurred over three phases, each involving significant patient and public engagement.  
54  
55  
56  
57  
58  
59

Co-developing engagement indicators – *BMJ Open* submission.

Phase 1: Selecting the measure

Phase 2: Stakeholder consultations including a survey and follow up with interviews

Phase 3: Modified Delphi Panel

*Phase 1: Selecting the measure*

This phase includes three steps.

**Step 1:** We identified patient engagement evaluation measures. A recently published Systematic Review<sup>(14)</sup> identified a number of validated patient engagement evaluation survey tools including; PEIRS (Patient Engagement In Research Scale),<sup>(15)</sup> PPEET (Public and Patient Engagement Evaluation Tool)<sup>(16)</sup> and WE-ENACT (Ways of Engaging- ENgagement ACTivity Tool).<sup>(17)</sup>

**Step 2:** We presented the identified patient engagement evaluation measures to our provincial council, the Albertans4HealthResearch Collaborative Council. Members of the council appreciated the scope and depth of the PPEET, as it captured the evaluation of patient and family engagement from the perspectives of different stakeholders (patient and family advisors, staff members, and organization leaders).<sup>(16)</sup>

**Step 3:** After identifying and selecting the measure, the PPEET was compared to existing PFA engagement measures used by SCNs. This step ensured that existing efforts aligned with the development of the final core of indicators.

Public and Patient Engagement Evaluation Tool (PPEET)<sup>(16)</sup> includes three types of questionnaires that can be used to assess public and patient engagement in health research and at health system level. The three questionnaires are:

1. A participant questionnaire for patient partners and staff members on their experiences working together in engagement initiatives. There are two versions available: one evaluating one-time engagements and another evaluating on-going/long-term engagements.
2. A project questionnaire that reviews and assesses three components of the process of engagement at health system level including the planning, execution, and impact of the engagement.
3. An organization questionnaire assesses how engagement is conducted within organizations.

Questionnaire 1 and 3 of the PPEET were chosen as they aligned best with the purposes of evaluating patient and family engagement within the SCNs.

*Phase 2: Stakeholder consultations*



*Co-developing engagement indicators – BMJ Open submission.*

This phase included two steps, an electronic PPEET survey, and semi-structured interviews with SCN staff, leadership and PFAs.

**Step 1:** Individuals from SCNs were contacted and invited to complete the PPEET as an anonymous on-line survey. This survey was populated into Qualtrics Software(18) for ease of use and widespread distribution. The aim was to assess the utility of the PPEET in capturing the experiences of participants in working together within their SCNs; as well as gathering potential barriers and facilitators in engagement in health research and system transformation.

Survey results were descriptively summarized and categorized according to the key areas of engagement: communication and supports for participation, sharing your views and perspectives, and impacts and influence of the engagement initiative. Frequencies were also reported.

**Step 2:** After completing the online survey, respondents were invited to a semi-structured interview. Interviews were conducted with a select number of SCN PFAs, leadership and staff members via a video-conferencing platform (e.g. Zoom) or by telephone. The interview guide was co-developed with patient and family partners and research team members. Interview guide questions were about the barriers and facilitators to engagement in health research and system transformation (APPENDIX 1). The semi-structured interviews were conducted by members of the research team (conducted by SZ, GW, SA, TM, qualitative research background).

The interviews were audio recorded, transcribed verbatim, and thematically analyzed, with deductive and inductive coding strategies.(19) Qualitative researcher (SA) followed the six-step thematic analysis Braun & Clarke method,(20) and had peer debriefing sessions at different stages of the analysis with MS to discuss themes and subthemes identified. After organizing codes into themes, they were presented back to the research team for feedback.

*Phase 3: Delphi Consensus Process*

Consensus methods are considered an effective tool for facilitating decision-making when there is insufficient information or when there is contradictory information.(21) The RAND/UCLA Appropriateness Method was used as a guide for the consensus process.(10) A consensus panel consisted of a diverse group of eight PFAs, five Scientific Directors, ten Assistant Scientific Directors/Managers/Staff liaisons.

The consensus process included three rounds. Round one was conducted via an electronic survey, round two via videoconference, and round three was completed via an electronic survey.

**Round One:** Using a modified Delphi technique,(10) panelists ranked each of the PFE-Is criteria according to a 9-point scale scoring as not relevant/to be discarded (1-3); consider more discussion (4-6) and relevant/accepted (7-9). Panelists were also given the opportunity to provide written comments and suggestions. Results from this phase were compiled and shared prior to the virtual face-to face Round 2.

Co-developing engagement indicators – *BMJ Open* submission.

**Round Two:** the panel and moderators convened over 2 hours via zoom. Moderators shared the results of the first round and facilitated a workshop noting any areas of disagreement indicated by the ratings and answered any questions about the process. The group deliberated, until agreement on the new patient and family engagement indicators was achieved. Two AbSPORU team members took notes to capture modifications made to the indicators and discussions from the consensus meeting. After the notes were analyzed and select indicators were modified, the indicators were presented to the panelists for a final round of voting.

**Round Three:** The discussed PFE-Is were refined based on the discussions and consensus that happened during Round Two. These PFE-Is were voted on 'overall importance' as keep or discard using an electronic survey.

Throughout the Delphi process panelists had the following information available to guide them through the consensus.

### Scale

Panelists used a 9-point rating scale. Ratings of 1-3 indicated not relevant/to be discarded; 4-6 if more discussion was needed; 7-9 as relevant/accepted. PFE-Is were accepted when 75% of the panelist's ratings were 7,8,9 without disagreement on the scale. Disagreement was declared when 5 or more than 5 panelists rated the indicator in the top and bottom parts of the scale (1-3 or 7-9).

The rating criteria provided to the panelists is displayed in Table 1. Panelists used these criteria to rate PFE-Is through the Delphi process.

**Table 1. Rating criteria**

| Criteria                                       | Definition                                                                                                                                                                                                                                                                                                                                                                                                                                                                                                                                                                                                                                                                                              |
|------------------------------------------------|---------------------------------------------------------------------------------------------------------------------------------------------------------------------------------------------------------------------------------------------------------------------------------------------------------------------------------------------------------------------------------------------------------------------------------------------------------------------------------------------------------------------------------------------------------------------------------------------------------------------------------------------------------------------------------------------------------|
| <b>Overall importance</b>                      | <p>This overall rating will be used to determine how important it is to measure and track this indicator for patient and family engagement within the SCNs</p> <p>A high score on this criterion indicates that compared with other indicators, this indicator is very important for measurement of patient and family engagement within the SCNs</p> <p>A low score on this criterion indicates that the indicator is not as important compared to the other indicators for measuring patient and family engagement within the SCNs</p> <p>When rating this indicator, consider how important is this indicator to you or your organization in promoting meaningful patient and family engagement.</p> |
| <b>Impact on Patient and Family Engagement</b> | <p>This rating will be used to determine whether this indicator will have a big impact on the engagement of patients and families within the SCNs</p>                                                                                                                                                                                                                                                                                                                                                                                                                                                                                                                                                   |

Co-developing engagement indicators – *BMJ Open* submission.

|                           |                                                                                                                                                                                                                                                                                                                                                                                                                                                                                                                                                                                                                                               |
|---------------------------|-----------------------------------------------------------------------------------------------------------------------------------------------------------------------------------------------------------------------------------------------------------------------------------------------------------------------------------------------------------------------------------------------------------------------------------------------------------------------------------------------------------------------------------------------------------------------------------------------------------------------------------------------|
|                           | <p>A high score on this criterion indicates that compared with other indicators, this indicator has a big impact on the engagement of patients and families within the SCNs</p> <p>A low score on this criterion indicates that compared with other indicators, this indicator does not have a big impact on the engagement of patients and families within the SCNs</p> <p>Improvements on this indicator will mean improved engagement of patient and family advisors</p>                                                                                                                                                                   |
| <b>Actionable by SCNs</b> | <p>This indicator reflects an area where improvements can be made. It can provide information to improve the engagement of patient and family advisors</p> <p>A high score on this criterion indicates that compared with other indicators, there is a big opportunity to change the results for this indicator within the SCNs</p> <p>A low score on this criterion indicates that compared with other indicators, there is not a big opportunity to change the results for this indicator within the SCNs</p> <p>This indicator could be measured to improve patient and family engagement within the SCNs, without too much difficulty</p> |
| <b>Interpretability</b>   | <p>This indicator provides clear information that is easy to communicate to stakeholder groups, including patient and family advisors.</p> <p>A high score on this criterion indicates that compared with other indicators, this indicator is easy to communicate to different audiences, with little explanation</p> <p>A low score on this criterion indicates that compared with other indicators, this indicator is more difficult to communicate to different audiences with little explanations</p>                                                                                                                                     |
| <b>Relevance</b>          | <p>This indicator addresses areas of major importance or concern related to patient and family engagement within the SCNs</p> <p>A high score on this criterion indicates that the indicator is very relevant to patient and family advisors, and the strategic clinical networks</p>                                                                                                                                                                                                                                                                                                                                                         |

Co-developing engagement indicators – *BMJ Open* submission.

|  |                                                                                                                                                                       |
|--|-----------------------------------------------------------------------------------------------------------------------------------------------------------------------|
|  | A low score on this criterion indicates that the indicator is not as relevant as other indicators to patient and family advisors, and the strategic clinical networks |
|--|-----------------------------------------------------------------------------------------------------------------------------------------------------------------------|

## Results

The results of the three phases are described by phase.

### *Phase 1.*

The AB4HR council members were consulted on the tool selection for measuring patient and family engagement. The criteria for selecting the initial measure tool was that the tool had to be free to use, relevant, actionable, measure engagement prospectively and from all members of the team and important to assess the engagement in health research and other initiatives informed by patients and family advisors. The council members completed the measures; the measures were discussed and the PPEET was selected because it was the one that met all the criteria.

### *Phase 2a*

The online survey was emailed to 175 patient and family advisors, 69 SCN staff members, and 49 SCN leadership members. 96 participants responded, including 51 PFAs and 45 healthcare stakeholders (31 SCN staff and 14 SCN leadership).

In general, there was some consistency in the responses. Most patient and family advisors agreed/strongly agreed that they:

- have a clear understanding of the purpose of the SCNs they are involved in (94%)
- have supports available to contribute to the SCNs projects (92%)
- have enough information to be able to carry out their role in the specific projects (81%)
- can express their views freely when working in projects (96%)
- are confident the SCNs take the feedback provided by patient and family advisors into consideration (81%)

Similarly, most or all SCN staff agreed/strongly agreed that they:

- have a clear understanding of the purpose of engaging patient and family advisors in the SCNs (100%)
- have supports and information available to effectively engage with patient and family advisors (87%)
- are able to express their views freely (86%)
- SCNs take the feedback of patient and family advisors into consideration (100%)
- felt the involvement of patient and family advisors make a difference in the work of the SCNs (100%)

### Co-developing engagement indicators – *BMJ Open* submission.

SCN leadership responded to a different module of the PPEET that focused on policy and practices that support patient and family advisor engagement, participatory culture, influence and impact, and collaboration and common purpose.

Most SCN leadership agreed:

- that the SCNs have an explicit strategy and framework for patient and family advisor engagement (86%)
- the SCNs have explicit strategies for recruiting patient and family advisors, depending on the engagement initiative (79%)
- a commitment to the principles and values of patient and family advisor engagement is found in key SCN documents (e.g., transformational roadmaps, etc.) (93%)

However, there were some mixed responses on the following:

- 50% of respondents were neutral on the statement that the resources available for patient and family advisor engagement is adequate (43% agreed/strongly agreed, and 7% disagreed.)
- 43% of respondents agreed/strongly agreed to SCNs preparing reports that summarize the contributions from patient and family advisor engagement initiatives (36% of respondents were neutral and 21% disagreed.)
- The statement “Comprehensive patient and family engagement training and materials are available to support staff who are leading and supporting these activities.” had 42% responding neutral, 41% agreeing/strongly agreeing, and 17% disagreeing.

Some of the SCN leadership that responded neutral for some statements indicated in the comments that this was due to lack of awareness on specific activities and resources. The results indicate variation among the 11 SCNs and 5 Provincial Programs in how patient and family engagement is conducted and reported.

Phase 2b - Interviews were conducted with 26 individuals including 13 with PFAs and 13 healthcare stakeholders (6 SCN staff and 7 SCN leaders). Interviews ranged from 25 to 94 mins. Figure 2 displays an overview of the themes and subthemes, and Table 2 provides more details on the themes, subthemes, and associated quotes.

### **Improving Patient Engagement within the SCNs**

Both PFAs and SCN staff recognized the need for inclusive strategies for recruitment and retainment, to involve various other patients in health research and within SCNs. Some SCN staff expressed difficulties with recruiting new PFAs, and retaining current advisors.

Strategies mentioned by some staff included the importance of reaching out to clinical, special interest, and non-profit groups for support in recruiting PFAs, bringing awareness to what a patient advisor is, and utilizing social media.

Some staff also noted some barriers to recruitment including the:

### Co-developing engagement indicators – *BMJ Open* submission.

- onboarding process for the organization, which can be extensive for engagement especially those required for one-time or for a limited time.
- COVID-19 pandemic and how it impacted the time people have available.
- lack of compensation available for patient advisors which may exclude some advisors who represent marginalized and hard to reach communities (e.g. unhoused individuals).

Most PFAs who had felt supported in the engagement activities, mentioned having a strong relationship with their SCN team. SCN Leadership and staff also discussed their patient engagement strategy and how it evolved over time. Staff and Leadership felt supported in being able to carry out patient engagement in their work. To improve patient engagement within the SCN, participants highlighted various supports for patient engagement that are required to be consistent within the SCNs: resources about how to engage with patients and working together, mentorship for PFAs, capacity building opportunities for both SCN staff and patient and family advisors such as training and/or orientation. Some participants also discussed whether compensation for engagement would be needed as an acknowledgement of the time and contributions of PFAs. Finally, participants indicated a vital component for working together successfully included respectful engagement and the sincerity of those engaging patients. In various committees, participants indicated excellent partnerships were key to feeling respected and accordingly that they felt like they could contribute to the SCN.

Some participants highlighted the need for PFAs to be involved in decision-making processes through early engagement at the conception of the project and including PFAs in more leadership positions such as co-chairing or co-leading committees.

### **Communication with PFAs**

Some PFAs emphasized needing clear and timely communication about the status of projects, e.g. when projects were being implemented, whether projects were moving forward, and updates on the general work of the SCN. Participants emphasized the importance of setting clear expectations for engagement activities and for the role of a PFA. Some PFAs described their role within the SCNs as advising on projects, acting as leaders or members in patient advisory groups, being invited to share their stories/perspectives on their healthcare experiences, and providing input on meeting agendas. However, there were also some PFAs who mentioned lacking clarity on their role within the SCN when they had initially joined the network.

Some SCN staff discussed some challenges in managing expectations of PFAs (regarding timeline of the project, or the priorities of the network), which may have not aligned with the expectations of the PFAs. Some staff expressed how they had to communicate to patients the difference between advisor versus advocate as the roles are different within the SCNs, and have the potential to lead to differing priorities. One staff member discussed developing a 'parking lot' to provide a safe space in bringing up topics of concern and interest to PFAs, but not aligning with current priorities of the SCN. The aim of this idea is to ensure PFAs' ideas are not lost but recognized for the potential to address at a later date.

1 *Co-developing engagement indicators – BMJ Open submission.*

2

3

4

5 **Work Environment**

6

7

8 Most PFAs described feeling comfortable in being able to contribute in meetings with other stakeholders and still feeling engaged in virtual  
9 meetings and projects, and adapting well to working in a virtual setting. There were few PFAs who expressed frustration with lack of  
10 patient engagement in the SCNs during COVID, and some who had stepped down from their PFA position as a result.

11 Almost all SCN staff also mentioned working virtually with SCN teams including PFAs have been a positive experience (such as alleviating  
12 burden from travel or facilitating engagement). However, both SCN staff and PFAs mentioned missing the personal connection and  
13 networking aspect of in-person meetings. Other concerns with virtual engagement were that it would be more difficult for new advisors to  
14 be engaged in a virtual environment, and some advisors may be uncomfortable with technology and encounter connection issues.  
15  
16  
17  
18  
19

20 **Motivations to Sustain Engagement**

21

22

23 Most PFAs mentioned their reason for joining and staying was to have an impact on the healthcare system, and to feel like their  
24 contributions mattered.  
25  
26

27 There were mixed responses from PFAs on whether they felt acknowledged for their contributions and valued as team members. Some  
28 PFAs felt valued as members of their SCNs, and detailed ways in which they felt acknowledged for their contributions. There were also some  
29 PFAs who spoke about instances in which they felt they were low priority for the SCNs, or felt their involvement was tokenistic. Some PFAs  
30 also described how they valued learning from their SCN teams, learning about research, their conditions, and the healthcare system. For  
31 some PFAs, meeting people and building relationships was valuable in their engagement within the SCNs, and a reason for them to  
32 continue to stay involved.  
33  
34  
35  
36  
37  
38  
39  
40  
41  
42  
43  
44  
45  
46  
47  
48  
49  
50  
51

52 Table 2. Themes, sub-themes and selected quotes.

| Theme & subthemes | Quote |
|-------------------|-------|
|-------------------|-------|

53

54

55

56

57

58

59

60

Co-developing engagement indicators – BMJ Open submission.

|                                                                                                                            |                                                                                                                                                                                                                                                                                                                                                                                                                                                                                                                                                                                                                                                                                                                                                                                    |
|----------------------------------------------------------------------------------------------------------------------------|------------------------------------------------------------------------------------------------------------------------------------------------------------------------------------------------------------------------------------------------------------------------------------------------------------------------------------------------------------------------------------------------------------------------------------------------------------------------------------------------------------------------------------------------------------------------------------------------------------------------------------------------------------------------------------------------------------------------------------------------------------------------------------|
| <p>1<br/>2<br/>3 <b>Improving Patient Engagement within the SCNs</b></p>                                                   | <p>“I sent a letter in about two years ago to Dr. and I said, “you know, I've really enjoyed being involved but, you know, you need to get more members of the public involved, more than just me.” ..., not 20 but you know, maybe- they probably have 2 or 3 now, members of the SCN, or maybe more...part of the core committee, so I think...those are the things that I would potentially change” (PFA3)</p>                                                                                                                                                                                                                                                                                                                                                                  |
| <p>4<br/>5<br/>6<br/>7<br/>8 Inclusive recruitment strategies</p>                                                          | <p>“we have a real passionate group, right? And after two years I feel like a little bit of momentum has dropped. But I mean it was COVID for goodness sakes, right? ... we did recruit four new advisors in January so we tried anyways. But we still—we want to get a sweet spot of about 15 where at last half of them attend a meeting, right, whereas right now if we have 11 then we only have five or six attending... And I mean not that that's bad it's just, you want more voices, right? And people aren't responding, they're not great at responding to emails. Even though we send out lots of opportunities sometimes it's just that reach out directly to the person that works best.” (Staff4)</p>                                                               |
| <p>9<br/>10<br/>11<br/>12<br/>13<br/>14<br/>15<br/>16<br/>17<br/>18 Supports for engagement</p>                            | <p>“one of the first things I did was develop a resource for Skype because our—I think AHS either was in the process of or didn't have one that I felt was kind of user friendly. So I developed that and actually shared that amongst the networks to say hey, here I have this Skype for patients and families to use. We developed an orientation PowerPoint, so it really—once they've been fully onboarded then we do this orientation and it's probably 45 minutes presentation and discussion and questions. And it really talks about all the three areas in the network ...and it introduces who the network is all this kind of main subject areas... The other thing we did was a resource, it's like a dictionary...a glossary of terms for our network.” (Staff4)</p> |
| <p>19<br/>20<br/>21<br/>22<br/>23<br/>24<br/>25<br/>26<br/>27<br/>28<br/>29 Views on Respectful Engagement</p>             | <p>“the ones [that] are tokenism, and that decisions had already been made and they were just looking to tick a box on a form to say “yes, we had patient engagement”. And although there was some effort...I can spot a project to nowhere and I'm just a bobblehead as a patient advisor after one meeting,...At the beginning had more of those type of experiences, and as you gain experience and knowledge of how AHS works, you know to pick and choose what projects you think are realistic and that will actually move forward.” (PFA7)</p>                                                                                                                                                                                                                              |
| <p>30<br/>31<br/>32<br/>33<br/>34<br/>35<br/>36 Involvement in decision making</p>                                         | <p>“the other place I think that I want to get to is, as an SCN and not just me personally, is to really kind of really push the envelope more in terms of our involvement of our patient advisors as leaders within the SCN. So to really try to get them to be a bit more leading in terms of bringing their ideas forward and getting sort of at the end of that IAP2 spectrum really coming up with the ideas and being able to run with them and work on it from that perspective. And I think some people are ready to do that, especially the PACER grads. But I think I'd like to see the whole community move that way.” (SCNLead7)</p>                                                                                                                                   |
| <p>37<br/>38<br/>39<br/>40<br/>41<br/>42<br/>43<br/>44<br/>45 <b>Communication with PFAs</b></p>                           | <p>“there was a long-time patient or family advisor who wanted the network to work on something that he was interested in. But it didn't align with operational priorities so it never rose to the top...We can't do everything and for him to be meaningfully engaged... we and he decided that how he contributed to the network would change. And he came more focused on other contributions to research and to providing inputs occasionally to surveys that we would do, and certainly continuing to receive communications, etc. But when there isn't that alignment, we can't force it.” (SCNLead2)</p>                                                                                                                                                                    |
| <p>46<br/>47 Role clarity &amp; expectations<br/>48<br/>49<br/>50<br/>51<br/>52<br/>53<br/>54 Communication Strategies</p> | <p>“staff would call us to talk about the agenda... review the agenda...so we were really kept informed as to what was going on” (PFA6)</p>                                                                                                                                                                                                                                                                                                                                                                                                                                                                                                                                                                                                                                        |



Co-developing engagement indicators – *BMJ Open* submission.

|                                                            |                                                                                                                                                                                                                                                                                                                                                                                                                                                                                                                          |
|------------------------------------------------------------|--------------------------------------------------------------------------------------------------------------------------------------------------------------------------------------------------------------------------------------------------------------------------------------------------------------------------------------------------------------------------------------------------------------------------------------------------------------------------------------------------------------------------|
| Work environment                                           | “I remember when I went to my very first meeting, I was so nervous because I thought like they would be like “you interlopers, what are you doing here,” kind of thing. I thought we would stand out and be like really weird, and it was completely the opposite. It was incredibly welcoming” (PFA2)                                                                                                                                                                                                                   |
| Comfort to contribute                                      | “I was on a side project...the person who was leading the project, ...would ask a question. And one time – one question, the physician would answer first...high up EMS people would answer, and then she would ask us as family patient advisors. The next question: she’d flip it and she’d ask the EMS guys first, then the family patient advisors, then the physician...Never have I felt more like an equal than I did on that project.” (PFA11)                                                                   |
| Adapting to virtual involvement due to COVID               | “it depends on the meeting, like once it's too big, you kind of lose people and everybody is drifting off, but for smaller engagement it's- it's actually very effective. It's good for the environment, because there's less travel, and it's good for infection control, because before the pandemic, if we were getting people together face-to-face, if one person decided to go with a cold, they probably would leave some of that virus behind. So, it's the future” (SCNLead4)                                   |
| Motivations to sustain engagement<br>Relationship-building | “I've also benefited from the relationships I've formed with people and from the respect I've gotten from that... it is satisfying to know that your voice is appreciated and that really is – really is the way – why I was involved and why I keep being involved with the research.” (PFA8)                                                                                                                                                                                                                           |
| Feeling valued                                             | “I wanted to commend the SCNs in their ability to make patients feel like superstars. You know, to help us recognize that we are as important as the head of Nephrology. And there's a huge ego boost in that and that ego boost is necessary in order to give people the confidence to speak up.” (PFA5)                                                                                                                                                                                                                |
| Learning opportunities                                     | “that's been the joy of the SCN as well. Is really learning. The physician and medical experience which I want more of, as well as hearing other patient partners and building that network. I've had this opportunity and I've always been a lifelong learner, so every time I attend a presentation, every time I'm part of an event, I'm learning more about research, I'm learning more about kidney function, but I'm learning more about people even more important to me, so it has been really valuable.” (PFA4) |
| Having an impact on the healthcare system                  | “I'll admit, I was a little – not suspicious, but fatalistic at first, thinking, yeah, will it make any difference? But the more I found that they really took patient complaints or suggestions positively, and I saw things actually being enacted that made a difference. It kept me going and eager to do more.” (PFA12)                                                                                                                                                                                             |

**Phase 3**

During phase 3, 23 participants (8 PFAs, 15 healthcare stakeholders) arrived at consensus on the core PFE-Is over three rounds of discussions. They rated each indicator based on the following criteria: overall importance, impact on patient and family engagement, actionable by SCNs, interpretability, and relevance. (Figure 3).

At the end of the third round, seven different categories of PFE-Is were developed, including:

Co-developing engagement indicators – *BMJ Open* submission.

1. **Communication:** Assess whether enough information has been provided to PFAs to have an overall understanding of the SCNs and specifically their role.
2. **Comfort to Contribute:** Assess whether PFAs are comfortable in contributing within their SCNs, through expressing their views freely.
3. **Supports for Engagement:** Assess whether there are necessary supports available for patient and family engagement within the SCNs for PFAs and SCN staff.
4. **Impact and Influence of Engagement Initiative:** Assess whether PFAs and SCN staff agree that involvement of PFAs make a difference in the work of the SCNs, and that SCNs take the feedback provided by PFAs into consideration.
5. **Diversity of Perspectives:** Assess whether individuals engaging in SCN teams represent a broad range of perspectives
6. **Respectful Engagement:** Assess whether individuals engaging in SCN teams perceive the engagement as respectful and sincere to working together
7. **Working Together:** Assess whether PFAs work together with SCN staff to design, conduct, and disseminate SCN projects

The results from this Delphi consensus generating process are displayed in Table 3. A brief discussion of these results follows. Specifically, 33 PFE-Is were developed through phase 1 and phase 2 of this work. These 33 drafted indicators were presented to the panel for rating using the rating criteria: overall importance, impact on patient and family engagement, actionable by SCNs, interpretability, and relevance.

During the first round and based on final ratings, one indicator was discarded: Each SCN prepares reports that summarize the contributions from patient and family advisor engagement initiatives, as the overall importance was rated low.

During round 2, eight indicators were discarded by the panelists as these PFE-Is were perceived by the panelists as too broad and difficult to measure including: PFAs being meaningfully engaged virtually; PFAs have a supportive working environment to contribute to the engagement initiative; SCNs have mentorship opportunities for PFAs; Each SCN has an explicit strategy or framework for patient engagement; Each SCN is at the stage of established/making some progress in engagement with patient and family advisors; Each SCN has explicit strategies for recruiting patient and family advisors, depending on the engagement initiative; There are resources (documents, guidelines) available to SCN Staff for PFA engagement; The SCN is achieving its stated objectives.

Of the 24 indicators from round 2, eleven indicators were accepted by the panelists and 13 indicators needed to be refined by the panelists at the third round of voting. From round 3 of voting, six indicators were discarded by panelists: PFAs have received training on patient engagement (e.g. orientation to patient-oriented research by AbSPORU); SCN staff have received training on patient engagement (e.g. orientation to patient-oriented research by AbSPORU); The responsibilities related to patient engagement are clearly articulated in my job description; There are dedicated patient and family engagement leadership positions; AHS Resources for Patient Engagement are useful for partnering with patient and family advisors (answered by SCN staff); SCN staff work together with PFAs to disseminate SCN projects (e.g. co-presenting at conferences, sharing work widely) (answered by SCN staff)

Co-developing engagement indicators – *BMJ Open* submission.

A final core group of 18 indicators were accepted. Details of the final indicators (numerator and denominator) are included in APPENDIX II.

Table 3. Summary of consensus panel ratings on overall importance for the final 18 patient and family engagement indicators

| Patient and Family Engagement Indicators                                                                  | Round 1 remote panel rating<br>(Median score on 9-point scale and (IQR)) | Round 2 online consensus meeting decision                                          | Round 3 remote panel decision<br>(% of panelists voting to keep on select indicators) | Evidence Sources<br>(PPEET<br>I=interviews<br>C=consensus) |
|-----------------------------------------------------------------------------------------------------------|--------------------------------------------------------------------------|------------------------------------------------------------------------------------|---------------------------------------------------------------------------------------|------------------------------------------------------------|
| 1. <i>Enough Information about the role</i>                                                               | 8 (7-9)                                                                  | Keep                                                                               | N/A                                                                                   | PPEET, I                                                   |
| 2. <i>Clear understanding of the purpose of the SCN that I am a part of</i>                               | 7 (6-9)                                                                  | Keep, with edits                                                                   | Keep (90%)                                                                            | PPEET, C                                                   |
| 3. <i>Able to express views freely</i>                                                                    | 8 (8-9)                                                                  | Keep                                                                               | N/A                                                                                   | PPEET, I                                                   |
| <b>Supports for Engagement Indicators (n=2)</b>                                                           |                                                                          |                                                                                    |                                                                                       |                                                            |
| 4. <i>PFAs have supports available for engagement (e.g. technology, travel)</i>                           | 8 (7-9)                                                                  | Keep, with edits                                                                   | Keep (80%)                                                                            | PPEET, I, C                                                |
| 5. <i>AHS Resources for Patient Engagement are useful for partnering with patient and family advisors</i> | Not developed                                                            | Newly developed derived from previous "Resources for Patient Engagement Indicator" | Keep (80%)                                                                            | C                                                          |
| 6. <i>Involvement of PFAs make a difference in the work of SCNs (answered by PFAs)</i>                    | 9 (8-9)                                                                  | Keep                                                                               | N/A                                                                                   | PPEET, I                                                   |
| 7. <i>Involvement of PFAs make a difference in the work of SCNs (answered by SCN staff)</i>               | 9 (8-9)                                                                  | Keep                                                                               | N/A                                                                                   | PPEET, I                                                   |
| 8. <i>SCNs take the feedback provided by PFAs into consideration (answered by PFAs)</i>                   | 8 (7-9)                                                                  | Keep                                                                               | N/A                                                                                   | PPEET, I                                                   |
| 9. <i>SCNs take the feedback provided by PFAs into consideration (answered by SCN staff)</i>              | 8 (7-9)                                                                  | Keep                                                                               | N/A                                                                                   | PPEET, I                                                   |
| 10. <i>Individuals engaging in SCN teams represent a broad</i>                                            | 8.5 (7.25-9)                                                             | Keep                                                                               | N/A                                                                                   | PPEET, I                                                   |

Co-developing engagement indicators – *BMJ Open* submission.

|                                                    |                                                                                                                                                                                                       |               |                                                                    |            |          |
|----------------------------------------------------|-------------------------------------------------------------------------------------------------------------------------------------------------------------------------------------------------------|---------------|--------------------------------------------------------------------|------------|----------|
| 1<br>2<br>3                                        | <i>range of perspectives (answered by PFAs)</i>                                                                                                                                                       |               |                                                                    |            |          |
| 4<br>5<br>6<br>7                                   | <b>11. Individuals engaging in SCN teams represent a broad range of perspectives (answered by PFAs)</b>                                                                                               | 8.5 (7.25-9)  | Keep                                                               | N/A        | PPEET, I |
| 8<br>9<br>10<br>11<br>12<br>13                     | <b>12. Individuals engaging in SCN teams perceive the engagement as respectful and sincere to working together (answered by PFAs)</b>                                                                 | 9 (8-9)       | Keep                                                               | N/A        | I        |
| 14<br>15<br>16<br>17<br>18<br>19                   | <b>13. Individuals engaging in SCN teams perceive the engagement as respectful and sincere to working together (answered by SCN staff)</b>                                                            | 9 (8-9)       | Keep                                                               | N/A        | I        |
| 20<br>21<br>22<br>23<br>24<br>25<br>26             | <b>14. PFAs work together with SCN staff to design SCN projects (e.g. in priority setting &amp; planning, development of proposals) (answered by PFAs)</b>                                            | Not developed | Newly developed derived from previous “Working Together Indicator” | Keep (95%) | C, CS    |
| 27<br>28<br>29<br>30<br>31<br>32<br>33             | <b>15. SCN staff work together with PFAs to design SCN projects (e.g. in priority setting &amp; planning, development of proposals) (answered by SCN staff)</b>                                       | Not developed | Newly developed derived from previous “Working Together Indicator” | Keep (95%) | C, CS    |
| 34<br>35<br>36<br>37<br>38<br>39<br>40<br>41<br>42 | <b>16. PFAs work together with SCN staff to conduct SCN projects (e.g. collaborate in data collection, analysis/interpretation, advising on project as it is carried out) (answered by PFAs)</b>      | Not developed | Newly developed derived from previous “Working Together Indicator” | Keep (79%) | C, CS    |
| 43<br>44<br>45<br>46<br>47<br>48<br>49<br>50       | <b>17. SCN staff work together with PFAs to conduct SCN projects (e.g. collaborate in data collection, analysis/interpretation, advising on project as it is carried out) (answered by SCN staff)</b> | Not developed | Newly developed derived from previous “Working Together Indicator” | Keep (90%) | C, CS    |
| 51<br>52<br>53<br>54<br>55<br>56                   | <b>18. PFAs work together with SCN staff to disseminate SCN projects (e.g. co-presenting at conferences, sharing work widely)</b>                                                                     | Not developed | Newly developed derived from previous “Working                     | Keep (75%) | C, CS    |

## Discussion

Working in partnership with the AHS SCN teams, their advisors in the Patient Engagement Reference Group, and the Albertans4HealthResearch Collaborative Council, we co-developed patient and family engagement indicators to measure engagement in health system transformation. Through an initial synthesis of the evidence and a consensus approach using the PFE-Is we were able to select 18 indicators that reflect meaningful patient engagement. The findings align with the core principles highlighted in the CIHR SPOR Patient Engagement framework: Inclusiveness, Support, Mutual Respect, and Co-Build.<sup>(11)</sup>

The final 18 evidence-based and patient, family and stakeholder informed indicators are ready to be used to measure and evaluate meaningful engagement in health system transformation. The use of these indicators promotes the changes needed to improve the quality of health research and health system improvement that is informed by patients and families. The use of the indicators within the healthcare system to learn from and evaluate health policy and practice related to what matters to patients and families is a critical next step.

The strength of this study is the participatory approach used to develop PFE-Is, which ensures that engagement was evaluated from the perspective of those who provide and receive care. To our knowledge, this is the first study to develop a set of PFE-Is using a rigorous evidence-based and person-centred approach and involving the patient and caregiver throughout the research process—from inception of the project to manuscript development including dissemination activities.

Using a highly participatory approach, we sought to ensure that the study was guided by the perspective of individuals with lived experiences, and that diverse perspectives were reflected in the development of the PFE-Is.

While measures of engagement were identified in Boivin et al. review,<sup>(14)</sup> these were not considered indicators as per the definition of indicators suggested by the Agency for Healthcare Research and Quality - as units of measurement, such as percentage or proportion.<sup>(22)</sup> The selected measure, PPEET,<sup>(16)</sup> was identified by patients, caregivers and other individuals from diverse communities in Alberta as the measure to use given it was relevant and addressed important domains measuring patient engagement.

These newly developed indicators present an opportunity to improve meaningful engagement ensuring that the voices of the individuals with lived experiences are incorporated into health systems supporting the transformation of healthcare. To drive changes in healthcare policy and practice, there is a need to develop and implement standardized ongoing mechanisms to measure and evaluate healthcare

1 *Co-developing engagement indicators – BMJ Open submission.*

2  
3  
4 incorporating the patients' perspectives. In doing so, the effectiveness of engagement practices can be strengthened and advanced across  
5 the system.  
6  
7

8 A limitation of this project is that this set of indicators have not been evaluated. However, a future direction of this work is to evaluate and  
9 implement the indicators within the current healthcare system. We have started consultations with AHS SCNs stakeholders to assess the  
10 feasibility of data collection processes. Only by attempting real-world data collection can we determine whether the indicators meet the  
11 traditional standards of 'good-quality measures', to be acceptable, reliable and valid.<sup>(23)</sup> Moreover, studying the implementation of the  
12 PFE-Is could shed light into their effectiveness for promoting improvements in patient engagement across the SCNs for specific projects  
13 (health research and quality improvement). It is also important to identify any unintended consequences as a result of the implementation  
14 of these PFE-Is, of their use for benchmarking and other issues that may arise, such as implications on staff workload and their cost-  
15 effectiveness.  
16  
17  
18  
19  
20  
21

22 Additionally, while this method has generated these 18 PFE-Is using a validated consensus method, they may not necessarily be universally  
23 applicable in all settings and countries due to differing healthcare systems. Different cultural settings in different healthcare regulatory  
24 environments may mean that different measures may be more appropriate for certain settings. Further work can be done to tailor and  
25 adapt these PFE-Is, recognizing that a consideration of the local context will ensure a more universal relevance. Future steps for this work  
26 include the evaluation of implementing these indicators within the SCNs.  
27  
28  
29  
30

31 **Author Contributions:** MS and TW conceived and designed the study. TM, GW, SZ, SA conducted data collection. SA and MS worked on  
32 the analysis and interpretation of findings, with feedback from TW, PF, GW, SZ, MM, JP, TM. MS, SA, PF drafted the article, and all  
33 authors (TW, GW, SZ, PF, MM, JP) provided critical feedback and approved the manuscript to be published.  
34  
35  
36  
37

38 **Funding:** This work was supported by Canadian Institutes of Health Research (CIHR) Strategy for Patient-Oriented Research (SPOR)  
39 (Grant Number: N/A).  
40  
41

42 **Ethics Approval:** The University of Calgary Conjoint Health Research Ethics Board (CHREB) has approved this project (REB20-1822).  
43  
44

45 **Competing Interests:** None declared.  
46  
47

48 **Patient consent for publication:** Not applicable.  
49  
50

51 **Data Sharing:** This study analyzes qualitative data and the participants did not consent to have their full transcripts made publicly  
52 available. Other additional data available upon reasonable request.  
53  
54  
55  
56  
57  
58  
59  
60

1 Co-developing engagement indicators – *BMJ Open* submission.

2  
3  
4 **Acknowledgments:** Ana Flechas and Dr. Sumedh Bele for their support in phase 2 of data collection. We would also like to acknowledge our  
5 Albertans4Health Research Collaborative Council, the Alberta Health Services Strategic Clinical Networks, and patient and family advisors  
6 for their participation.  
7

8  
9  
10 **References**

- 11  
12  
13 1. Santana M-J, Manalili K, Zelinsky S, Brien S, Gibbons E, King J, et al. Improving the quality  
14 of person-centred healthcare from the patient perspective: development of person-centred  
15 quality indicators. *BMJ open*. 2020;10(10):e037323.  
16 2. Bombard Y, Baker G, Orlando E, Fancott C, Bhatia P, Casalino S. & Pomey, MP (2018).  
17 Engaging patients to improve quality of care: a systematic review. *Implementation*  
18 *Science*.13(1):98.  
19 3. Veitch D, editor One province, one healthcare system: a decade of healthcare  
20 transformation in Alberta. *Healthcare management forum*; 2018: Sage Publications Sage CA:  
21 Los Angeles, CA.  
22 4. Wasylak T, Strilchuk A, Manns B. Strategic clinical networks: from pilot to practice  
23 change to planning for the future. *CMAJ*. 2019;191(Suppl):S54-S6.  
24 5. Yiu V, Belanger F, Todd K. Alberta's strategic clinical networks: enabling health system  
25 innovation and improvement. *CMAJ*. 2019;191(Suppl):S1-S3.  
26 6. Mork M, Laxdal G, Wilkinson G. Patient and family engagement in Alberta's Strategic  
27 Clinical Networks. *CMAJ*. 2019;191(Suppl):S4-S6.  
28 7. McCarron TL, Moffat K, Wilkinson G, Zelinsky S, Boyd JM, White D, et al. Understanding  
29 patient engagement in health system decision-making: a co-designed scoping review.  
30 *Systematic reviews*. 2019;8(1):1-10.  
31 8. McCarron TL, Noseworthy T, Moffat K, Wilkinson G, Zelinsky S, White D, et al. A  
32 co-designed framework to support and sustain patient and family engagement in health-care  
33 decision making. *Health Expectations*. 2020.  
34 9. Alberta SPOR SUPPORT Unit. Patient Engagement 2022 [cited 2022 July 14]. Available  
35 from: <https://absporu.ca/patient-engagement/>.  
36 10. Fitch K, Bernstein SJ, Aguilar MD, Burnand B, LaCalle JR. The RAND/UCLA  
37 appropriateness method user's manual. Rand Corp Santa Monica CA; 2001.  
38 11. Canadian Institute for Health Research. Canadian Strategy for Patient-Oriented Research  
39 (SPOR) 2014 [cited 2022 July 14]. Available from: <http://www.cihr-irsc.gc.ca/e/41204.html>.  
40 12. Alberta SPOR SUPPORT Unit. PaCER- Patient and Community Engagement Research  
41 2022 [cited 2022 July 14]. Available from: <https://absporu.ca/patient-engagement/pacer/>.  
42 13. IMAGINE SPOR. IMAGINE Patient Research Partners 2022 [cited 2022 July 14]. Available  
43 from: <https://absporu.ca/patient-engagement/pacer/>.  
44 14. Boivin A, L'Espérance A, Gauvin FP, Dumez V, Macaulay AC, Lehoux P, et al. Patient and  
45 public engagement in research and health system decision making: a systematic review of  
46 evaluation tools. *Health Expectations*. 2018;21(6):1075-84.  
47  
48  
49  
50  
51  
52  
53  
54  
55  
56  
57  
58  
59  
60

15. Hamilton CB, Hoens AM, McQuitty S, McKinnon AM, English K, Backman CL, et al. Development and pre-testing of the Patient Engagement In Research Scale (PEIRS) to assess the quality of engagement from a patient perspective. *PloS one*. 2018;13(11):e0206588.
16. Abelson J, Li K, Wilson G, Shields K, Schneider C, Boesveld S. Supporting quality public and patient engagement in health system organizations: development and usability testing of the Public and Patient Engagement Evaluation Tool. *Health Expectations*. 2016;19(4):817-27.
17. Patient-Centered Outcomes Research Institute. Ways of Engaging-ENGagement ACTivity Tool (WE-ENACT) – patients and stakeholders 3.0 item pool. 2016 [cited 2022 July 14]. Available from: <https://www.pcori.org/sites/default/files/PCORI-WE-ENACT-3-0-Patients-Stakeholders-Item-Pool-080916.pdf>.
18. Qualtrics. Online Survey Software 2021 [cited 2022 July 14]. Available from: <https://www.qualtrics.com/core-xm/survey-software/>.
19. Sandelowski M. What's in a name? Qualitative description revisited. *Research in nursing & health*. 2010;33(1):77-84.
20. Braun V, Clarke V. Using thematic analysis in psychology. *Qualitative research in psychology*. 2006;3(2):77-101.
21. Jones J, Hunter D. Consensus methods for medical and health services research. *BMJ: British Medical Journal*. 1995;311(7001):376.
22. Agency for Healthcare Research and Quality (AHRQ). AHRQ Quality Indicator Tools for Data Analytics 2022 [cited 2022 July 14]. Available from: <https://www.ahrq.gov/data/qualityindicators/index.html>.
23. Groh R, Wensing M, Eccles M, Davis D. *Improving patient care: the implementation of change in health care*: John Wiley & Sons; 2013.



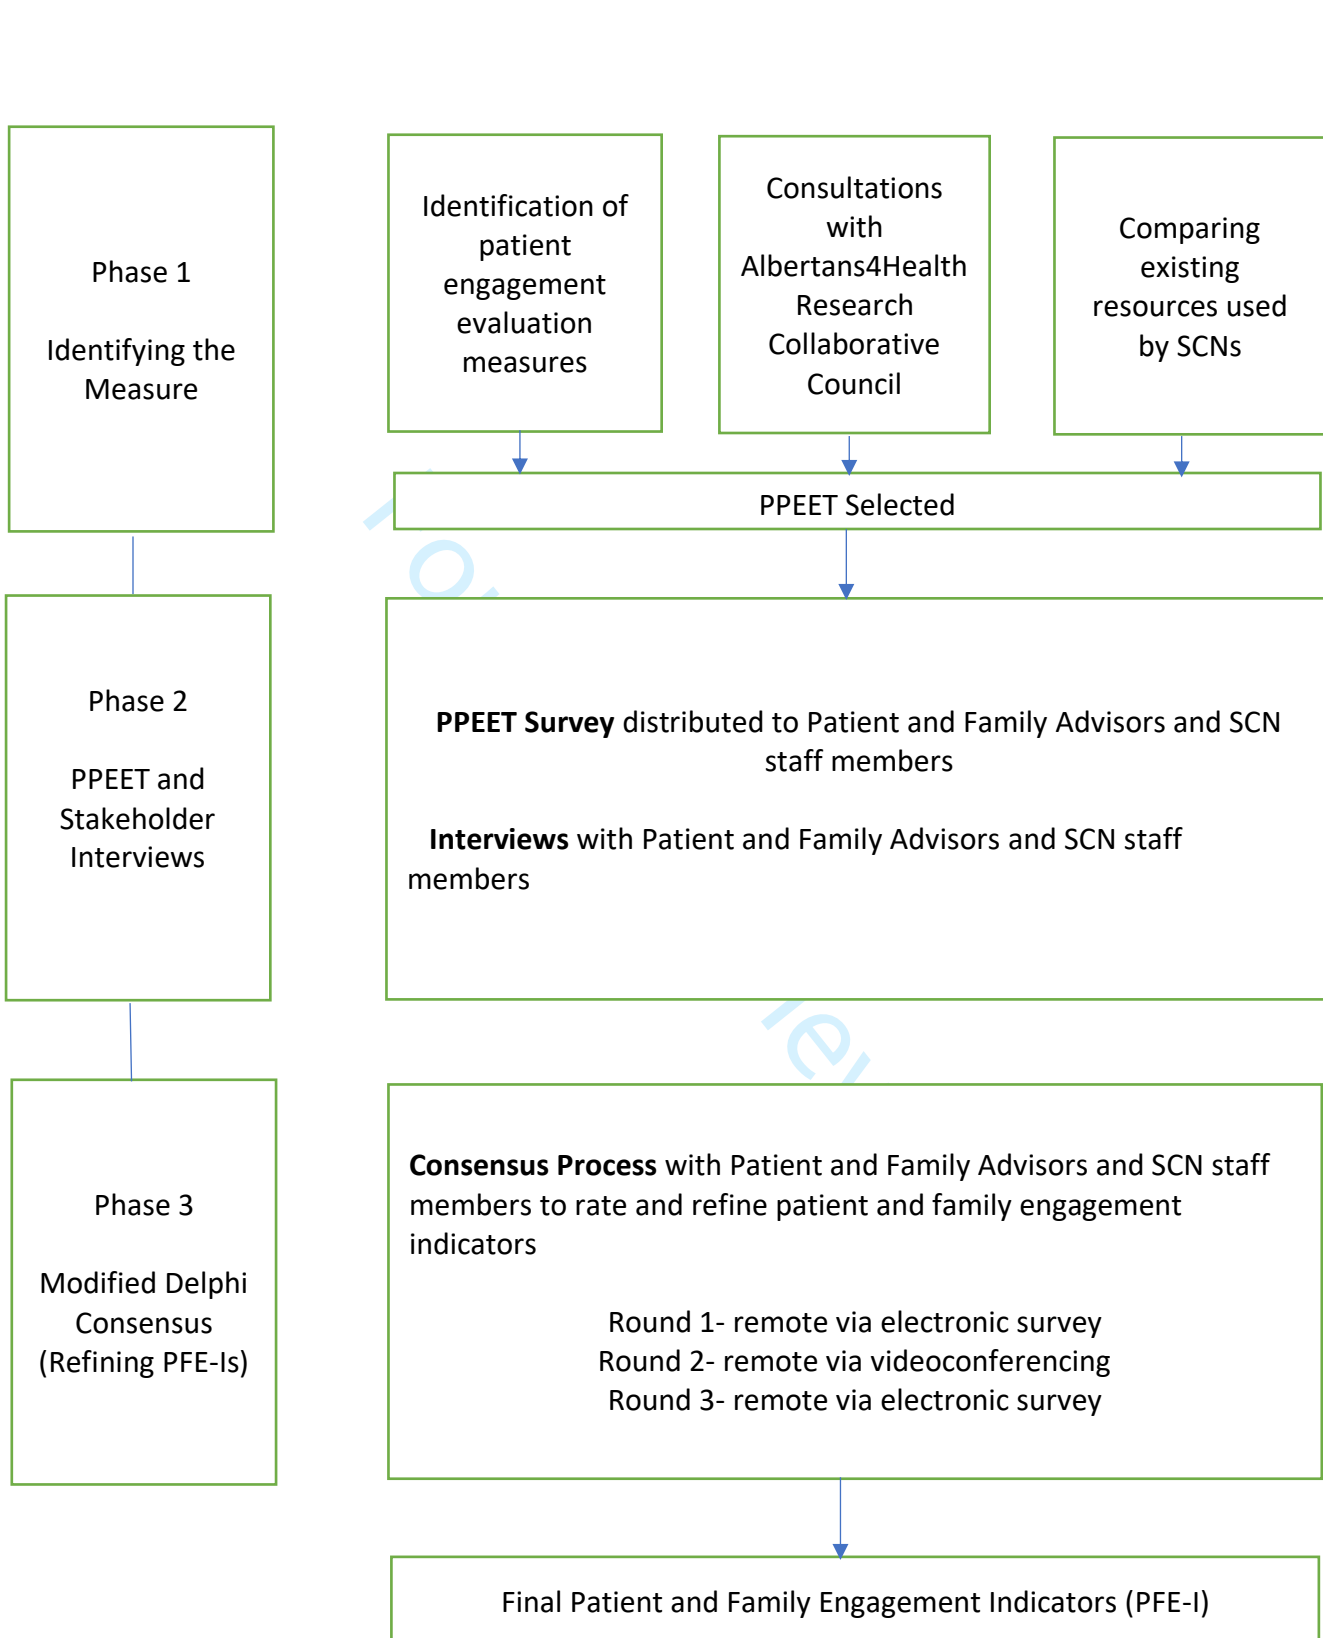

Figure 1. An overview of the program of research on the development of patient and family engagement indicators

Figure 2. Overview of themes and sub-themes identified from interviews with PFAs and SCN staff

|                                                                                                                                      |                                                                                                                                                                                                                                                                      |                                                                                                                                                                                                                                         |                                                                                                                                                                           |                                                                                                                                                                                            |
|--------------------------------------------------------------------------------------------------------------------------------------|----------------------------------------------------------------------------------------------------------------------------------------------------------------------------------------------------------------------------------------------------------------------|-----------------------------------------------------------------------------------------------------------------------------------------------------------------------------------------------------------------------------------------|---------------------------------------------------------------------------------------------------------------------------------------------------------------------------|--------------------------------------------------------------------------------------------------------------------------------------------------------------------------------------------|
| <b>Themes</b>                                                                                                                        | <b>1. Improving Patient Engagement within the SCNs</b>                                                                                                                                                                                                               |                                                                                                                                                                                                                                         |                                                                                                                                                                           |                                                                                                                                                                                            |
|                                                                                                                                      | <b>Inclusive recruitment strategies</b>                                                                                                                                                                                                                              | <b>Supports for PE</b>                                                                                                                                                                                                                  | <b>Respectful Engagement</b>                                                                                                                                              | <b>Involvement in decision making</b>                                                                                                                                                      |
|                                                                                                                                      | "the only thing I could suggest is really like having a stipend available for those who need it... It may encourage more diversity" (Staff1)                                                                                                                         | "I basically mentor them; I reach out for any opportunities, whether it's for further project work or for telling their story at co-meetings" (Staff4)                                                                                  | "the ones [that] are tokenism, and that decisions had already been made and they were just looking to tick a box on a form to say "yes, we had patient engagement" (PFA7) | "push the envelope more in terms of our involvement of our patient advisors as leaders within the SCN... I think some people are ready to do that, especially the PACER grads." (SCNLead7) |
|                                                                                                                                      | <b>2. Communication with PFAs</b>                                                                                                                                                                                                                                    |                                                                                                                                                                                                                                         |                                                                                                                                                                           |                                                                                                                                                                                            |
| <b>Communication Strategies</b>                                                                                                      |                                                                                                                                                                                                                                                                      | <b>Role clarity &amp; Expectations</b>                                                                                                                                                                                                  |                                                                                                                                                                           |                                                                                                                                                                                            |
| "staff would call us to talk about the agenda... review the agenda...so we were really kept informed as to what was going on" (PFA6) |                                                                                                                                                                                                                                                                      | "...there has to be a real discussion about what is their role?...Because you want to have the role fit with what the patient's expectations are as well and... not every patient is maybe going to want to be as involved." (SCNLead6) |                                                                                                                                                                           |                                                                                                                                                                                            |
| <b>Subthemes</b>                                                                                                                     | <b>3. Work Environment</b>                                                                                                                                                                                                                                           |                                                                                                                                                                                                                                         |                                                                                                                                                                           |                                                                                                                                                                                            |
|                                                                                                                                      | <b>Adapting to virtual environment due to COVID</b>                                                                                                                                                                                                                  |                                                                                                                                                                                                                                         | <b>Comfort to Contribute</b>                                                                                                                                              |                                                                                                                                                                                            |
|                                                                                                                                      | "when COVID hit, our staff liaison started meeting with us and it was every two weeks we got together for an hour or an hour and a half on zoom, catch up on the news, find out what's going on...they really connected us in a very personal and strong way" (PFA4) |                                                                                                                                                                                                                                         |                                                                                                                                                                           |                                                                                                                                                                                            |
|                                                                                                                                      | <b>4. Motivations to sustain engagement</b>                                                                                                                                                                                                                          |                                                                                                                                                                                                                                         |                                                                                                                                                                           |                                                                                                                                                                                            |
| <b>Relationship-building</b>                                                                                                         | <b>Learning Opportunities</b>                                                                                                                                                                                                                                        | <b>Feeling valued</b>                                                                                                                                                                                                                   | <b>Impact on healthcare</b>                                                                                                                                               |                                                                                                                                                                                            |
| "I've also benefited from the relationships I've formed with people and from the respect I've gotten from that..." (PFA8)            | "I'm learning more about research, I'm learning more about kidney function, but I'm learning more about people...really valuable." (PFA4)                                                                                                                            | it is satisfying to know that your voice is appreciated...why I was involved." (PFA8)                                                                                                                                                   | "one of the hardest things for me was you just don't see anything get across the finish line so you wonder if your time is even worth anything right after that" (PFA1)   |                                                                                                                                                                                            |

-view only

Figure 3. A flow chart of the PFE-Indicators Modified Delphi Process

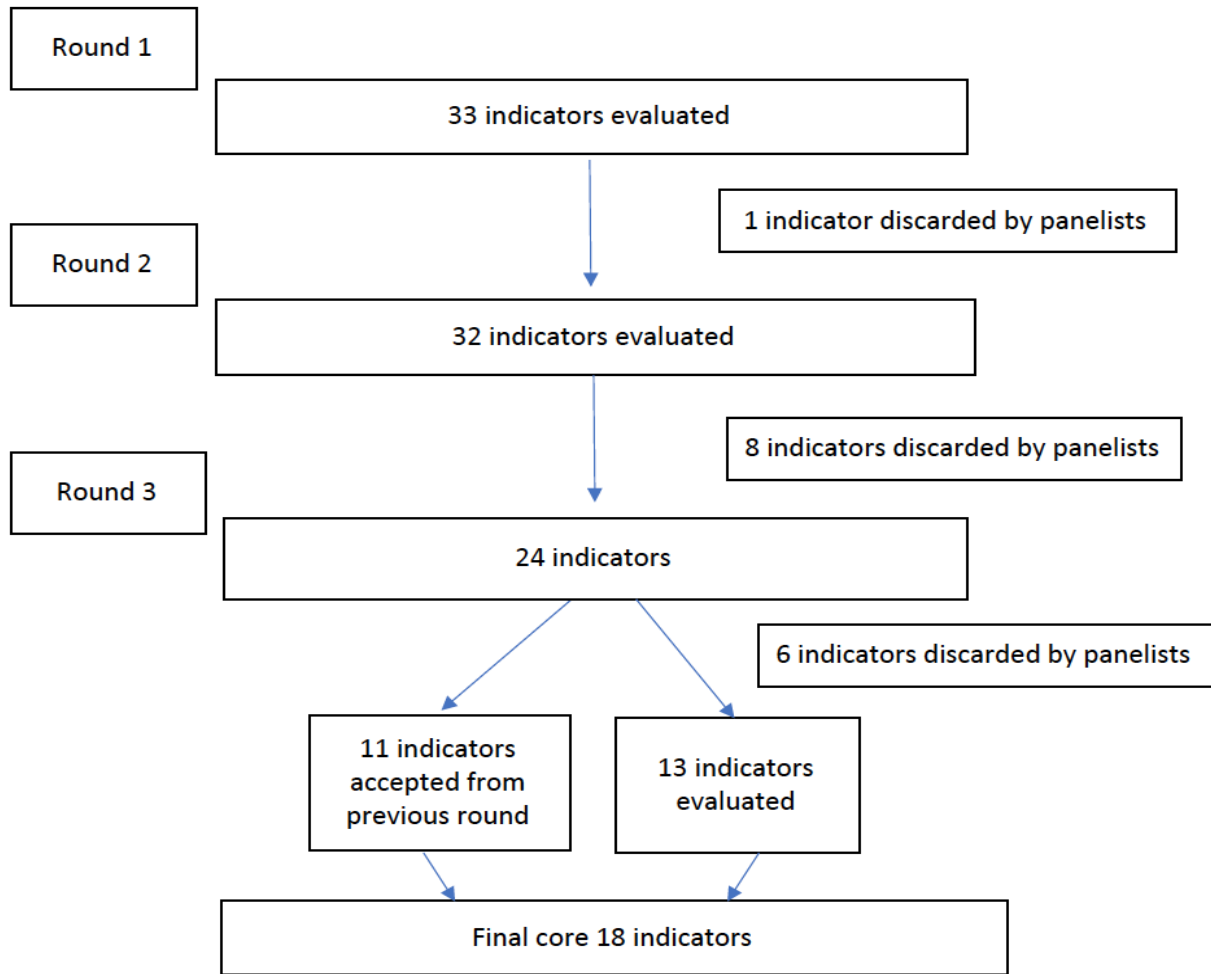

view only

## Evaluation of Patient Engagement in the SCNs: Interview Guide

### Interview Guide

1. How long have you been or were you involved with the SCNs?
2. Why did you decide to get involved in the SCNs?
3. How well was information about the patient and family advisor role communicated to you when you began your involvement with the SCNs? (*Was the purpose of patient/family engagement clear? Did you understand your role?*)
4. Can you describe how you have been involved?  
**Probes:** *What was your role? How have you contributed?*
5. On a scale of 1-10, with 1 being not good at all, and 10 being excellent, how would you rate the way the SCN team (clinicians, researchers, patient partners) works(ed) together?  
**Probes:** *Please comment on the way the research team worked together (clinicians, researchers, patient advisors)*  
*How were expectations/instructions communicated?*  
*How comfortable were you in contributing?*
6. Would you change anything regarding your involvement with the SCNs? (*e.g. time commitment, expectations, deadlines etc.*) / (**if project has ended**): If you could do it again, what would you change?
7. Sometimes there are challenges when researchers, patients, and other stakeholders work together. Have you encountered any challenges with your involvement in the SCNs?
8. Thinking about your contributions so far, what impact do you think you have had on SCN work?  
(considering both short- & long-term impacts, outputs of this work)  
**Probes:** *Impact of your involvement to this specific research project? To health research in general?*
9. How have you benefitted from your involvement?
10. When thinking about your involvement, why do you continue to do what you do?

1  
2  
3 11. What do you need to strengthen your involvement?  
4

5 12. What has been your experience working with teams virtually?  
6

7 **Probes:** *Did you feel like you could contribute, ask questions, raise concerns?*  
8

9 13. Based on your experience, do you have any suggestions for improvements that SCN  
10 teams could make when working with patient and family advisors?  
11  
12

13 14. Do you have any other comments/observations about your experience?  
14  
15  
16  
17  
18  
19  
20  
21  
22  
23  
24  
25  
26  
27  
28  
29  
30  
31  
32  
33  
34  
35  
36  
37  
38  
39  
40  
41  
42  
43  
44  
45  
46  
47  
48  
49  
50  
51  
52  
53  
54  
55  
56  
57  
58  
59  
60

1  
2  
3  
4  
5  
6  
7  
8  
9  
10  
11  
12  
13  
14  
15  
16  
17  
18  
19  
20  
21  
22  
23  
24  
25  
26  
27  
28  
29  
30  
31  
32  
33  
34  
35  
36  
37  
38  
39  
40  
41  
42  
43  
44  
45  
46  
47  
48  
49  
50  
51  
52  
53  
54  
55  
56  
57  
58  
59  
60

## APPENDIX II- Patient and Family Engagement Indicators

| Indicator Name                                                                                                | Numerator                                                                                                                                                                                       | Denominator                                           |
|---------------------------------------------------------------------------------------------------------------|-------------------------------------------------------------------------------------------------------------------------------------------------------------------------------------------------|-------------------------------------------------------|
| 1. Enough information about the role                                                                          | Number of PFAs who responded agree or strongly agree to having enough information about their role                                                                                              | Total number of PFAs responding to this question      |
| 2. Clear understanding of the purpose of the SCN that I am a part of                                          | Number of PFAs who responded agree or strongly agree to having a clear understanding of the purpose of the SCN they are a part of                                                               | Total number of PFAs responding to this question      |
| 3. Able to express views freely                                                                               | Number of PFAs who responded agree or strongly agree to being able to express their views freely                                                                                                | Total number of PFAs responding to this question      |
| 4. PFAs have supports available for engagement                                                                | Number of PFAs who responded agree or strongly agree to having supports (i.e. technology, travel) available for engagement                                                                      | Total number of PFAs responding to this question      |
| 5. AHS Resources for Patient Engagement are useful for partnering with patient and family advisors (for PFAs) | Number of PFAs who responded agree or strongly agree that AHS resources* for partnering with patient and family advisors are useful<br>* AHS Guidebook for engaging patient and family advisors | Total number of PFAs responding to this question      |
| 6. Involvement of PFAs make a difference in the work of SCNs (answered by PFAs)                               | Number of PFAs who responded agree or strongly agree to the statement that involvement of PFAs make a difference in the work of SCNs                                                            | Total number of PFAs responding to this question      |
| 7. Involvement of PFAs make a difference in the work of SCNs (answered by SCN staff)                          | Number of SCN staff who responded agree or strongly agree to the statement that involvement of PFAs make a difference in the work of SCNs                                                       | Total number of SCN staff responding to this question |
| 8. SCNs take the feedback provided by PFAs into consideration (answered by PFAs)                              | Number of PFAs who responded agree or strongly agree to the statement that SCNs take the feedback provided by PFAs into consideration                                                           | Total number of PFAs responding to this question      |
| 9. SCNs take the feedback provided by PFAs into consideration (answered by SCN staff)                         | Number of SCN staff who responded agree or strongly agree to the statement that SCNs take the feedback provided by PFAs into consideration                                                      | Total number of SCN staff responding to this question |
| 10. Individuals engaging in SCN teams represent a                                                             | Number of PFAs who responded agree or strongly agree that individuals engaging in the                                                                                                           | Total number of PFAs responding to this question      |

|                                                    |                                                                                                                                     |                                                                                                                                                                                                                              |                                                       |
|----------------------------------------------------|-------------------------------------------------------------------------------------------------------------------------------------|------------------------------------------------------------------------------------------------------------------------------------------------------------------------------------------------------------------------------|-------------------------------------------------------|
| 1<br>2<br>3<br>4<br>5<br>6<br>7                    | broad range of perspectives (answered by PFAs)                                                                                      | SCN teams represent a broad range of perspectives                                                                                                                                                                            |                                                       |
| 8<br>9<br>10<br>11<br>12<br>13<br>14               | 11. Individuals engaging in SCN teams represent a broad range of perspectives (answered by SCN staff)                               | Number of SCN staff who responded agree or strongly agree that individuals engaging in the SCN teams represent a broad range of perspectives                                                                                 | Total number of SCN staff responding to this question |
| 15<br>16<br>17<br>18<br>19<br>20<br>21<br>22<br>23 | 12. Individuals engaging in SCN teams perceive the engagement as respectful and sincere to working together (answered by PFAs)      | Number of PFAs who responded agree or strongly agree that the engagement was respectful and sincere to working together                                                                                                      | Total number of PFAs responding to this question      |
| 24<br>25<br>26<br>27<br>28<br>29<br>30<br>31<br>32 | 13. Individuals engaging in SCN teams perceive the engagement as respectful and sincere to working together (answered by SCN Staff) | Number of SCN staff who responded agree or strongly agree that the engagement was respectful and sincere to working together                                                                                                 | Total number of SCN staff responding to this question |
| 33<br>34<br>35<br>36<br>37<br>38                   | 14. PFAs work together with SCN staff to design SCN projects                                                                        | Number of PFAs who responded agree or strongly agree that they work together with SCN staff to design SCN projects (e.g. in priority setting & planning, development of proposals)                                           | Total number of PFAs responding to this question      |
| 39<br>40<br>41<br>42<br>43<br>44                   | 15. SCN staff work together with PFAs to design SCN projects                                                                        | Number of SCN staff who responded agree or strongly agree that they work together with PFAs to design SCN projects (e.g. in priority setting & planning, development of proposals)                                           | Total number of SCN staff responding to this question |
| 45<br>46<br>47<br>48<br>49<br>50<br>51<br>52       | 16. PFAs work together with SCN staff to conduct SCN projects                                                                       | Number of PFAs who responded agree or strongly agree that they work together with SCN staff to conduct SCN projects (e.g. collaborate in data collection, analysis/interpretation, advising on project as it is carried out) | Total number of PFAs responding to this question      |
| 53<br>54<br>55<br>56<br>57<br>58<br>59<br>60       | 17. SCN staff work together with PFAs to conduct SCN projects                                                                       | Number of SCN staff who responded agree or strongly agree that they work together with PFAs to conduct SCN projects (e.g.                                                                                                    | Total number of SCN staff responding to this question |

|                                                                   |                                                                                                                                                                                  |                                                  |
|-------------------------------------------------------------------|----------------------------------------------------------------------------------------------------------------------------------------------------------------------------------|--------------------------------------------------|
|                                                                   | collaborate in data collection, analysis/interpretation, advising on project as it is carried out)                                                                               |                                                  |
| 18. PFAs work together with SCN staff to disseminate SCN projects | Number of PFAs who responded agree or strongly agree that they work together with SCN staff to disseminate SCN projects (e.g. co-presenting at conferences, sharing work widely) | Total number of PFAs responding to this question |

For peer review only



1  
2  
3  
4  
5  
6  
7  
8  
9  
10  
11  
12  
13  
14  
15  
16  
17  
18  
19  
20  
21  
22  
23  
24  
25  
26  
27  
28  
29  
30  
31  
32  
33  
34  
35  
36  
37  
38  
39  
40  
41  
42  
43  
44  
45  
46  
47  
48  
49  
50  
51  
52  
53  
54  
55  
56  
57  
58  
59  
60

**Table 1**  
Consolidated criteria for reporting qualitative studies (COREQ): 32-item checklist

For peer review only

| No                                                     | Item                                            | BMJ Open | Guide questions/description                                                                                                   |
|--------------------------------------------------------|-------------------------------------------------|----------|-------------------------------------------------------------------------------------------------------------------------------|
| <b>Domain 1:<br/>Research team<br/>and reflexivity</b> |                                                 |          |                                                                                                                               |
| <b>Personal<br/>Characteristics</b>                    |                                                 |          |                                                                                                                               |
| 1.                                                     | <b>Interviewer/facilitator</b>                  |          | <b>Which author/s conducted the interview or focus group? (pg.6)</b>                                                          |
| 2.                                                     | <b>Credentials</b>                              |          | <b>What were the researcher's credentials? <i>E.g. PhD, MD</i> (pg.6)</b>                                                     |
| 3.                                                     | <b>Occupation</b>                               |          | <b>What was their occupation at the time of the study? (pg.6)</b>                                                             |
| 4.                                                     | <b>Gender</b>                                   |          | <b>Was the researcher male or female? (pg.6)</b>                                                                              |
| 5.                                                     | <b>Experience and training</b>                  |          | <b>What experience or training did the researcher have? (pg.6)</b>                                                            |
| <b>Relationship<br/>with<br/>participants</b>          |                                                 |          |                                                                                                                               |
| 6.                                                     | <b>Relationship established</b>                 |          | <b>Was a relationship established prior to study commencement? (pg.4)</b>                                                     |
| 7.                                                     | <b>Participant knowledge of the interviewer</b> |          | <b>What did the participants know about the researcher? <i>e.g. personal goals, reasons for doing the research</i> (pg.4)</b> |
| 8.                                                     | <b>Interviewer characteristics</b>              |          | <b>What characteristics were reported about the interviewer/facilitator? <i>e.g. Bias,</i></b>                                |

*assumptions, reasons and interests in the research topic*

---

**Domain 2: study design**

---

**Theoretical framework**

---

|    |                                              |                                                                                                                                                                               |
|----|----------------------------------------------|-------------------------------------------------------------------------------------------------------------------------------------------------------------------------------|
| 9. | <b>Methodological orientation and Theory</b> | <b>What methodological orientation was stated to underpin the study? <i>e.g. grounded theory, discourse analysis, ethnography, phenomenology, content analysis (pg.4)</i></b> |
|----|----------------------------------------------|-------------------------------------------------------------------------------------------------------------------------------------------------------------------------------|

---

**Participant selection**

---

|     |                 |                                                                                                         |
|-----|-----------------|---------------------------------------------------------------------------------------------------------|
| 10. | <b>Sampling</b> | <b>How were participants selected? <i>e.g. purposive, convenience, consecutive, snowball (pg.4)</i></b> |
|-----|-----------------|---------------------------------------------------------------------------------------------------------|

---

|     |                           |                                                                                                  |
|-----|---------------------------|--------------------------------------------------------------------------------------------------|
| 11. | <b>Method of approach</b> | <b>How were participants approached? <i>e.g. face-to-face, telephone, mail, email (pg.4)</i></b> |
|-----|---------------------------|--------------------------------------------------------------------------------------------------|

---

|     |                    |                                                        |
|-----|--------------------|--------------------------------------------------------|
| 12. | <b>Sample size</b> | <b>How many participants were in the study? (pg.9)</b> |
|-----|--------------------|--------------------------------------------------------|

---

|     |                          |                                                                              |
|-----|--------------------------|------------------------------------------------------------------------------|
| 13. | <b>Non-participation</b> | <b>How many people refused to participate or dropped out? Reasons? (N/A)</b> |
|-----|--------------------------|------------------------------------------------------------------------------|

---

**Setting**

---

|     |                                   |                                                                                 |
|-----|-----------------------------------|---------------------------------------------------------------------------------|
| 14. | <b>Setting of data collection</b> | <b>Where was the data collected? <i>e.g. home, clinic, workplace (pg.4)</i></b> |
|-----|-----------------------------------|---------------------------------------------------------------------------------|

---

|                        |                                     |                                                                                                        |
|------------------------|-------------------------------------|--------------------------------------------------------------------------------------------------------|
| 15.                    | <b>Presence of non-participants</b> | <b>Was anyone else present besides the participants and researchers? (No)</b>                          |
| 16.                    | <b>Description of sample</b>        | <b>What are the important characteristics of the sample? <i>e.g. demographic data, date</i> (pg.9)</b> |
| <b>Data collection</b> |                                     |                                                                                                        |
| 17.                    | <b>Interview guide</b>              | <b>Were questions, prompts, guides provided by the authors? Was it pilot tested? (pg.6)</b>            |
| 18.                    | <b>Repeat interviews</b>            | <b>Were repeat interviews carried out? If yes, how many? (no)</b>                                      |
| 19.                    | <b>Audio/visual recording</b>       | <b>Did the research use audio or visual recording to collect the data? (pg.6)</b>                      |
| 20.                    | <b>Field notes</b>                  | <b>Were field notes made during and/or after the interview or focus group? (yes)</b>                   |
| 21.                    | <b>Duration</b>                     | <b>What was the duration of the interviews or focus group? (pg 10)</b>                                 |
| 22.                    | <b>Data saturation</b>              | <b>Was data saturation discussed? (pg6)</b>                                                            |
| 23.                    | <b>Transcripts returned</b>         | <b>Were transcripts returned to participants for comment and/or correction? (no)</b>                   |

**Domain 3:  
analysis and  
findings**

1  
2  
3  
4 **Data analysis**  
5

|                            |     |                                       |                                                                           |
|----------------------------|-----|---------------------------------------|---------------------------------------------------------------------------|
| 6<br>7<br>8<br>9           | 24. | <b>Number of data coders</b>          | <b>How many data coders coded the data? (pg.6)</b>                        |
| 10<br>11<br>12<br>13       | 25. | <b>Description of the coding tree</b> | <b>Did authors provide a description of the coding tree? (pg.6)</b>       |
| 14<br>15<br>16<br>17<br>18 | 26. | <b>Derivation of themes</b>           | <b>Were themes identified in advance or derived from the data? (pg.6)</b> |
| 19<br>20<br>21<br>22       | 27. | <b>Software</b>                       | <b>What software, if applicable, was used to manage the data? (pg.6)</b>  |
| 23<br>24<br>25<br>26       | 28. | <b>Participant checking</b>           | <b>Did participants provide feedback on the findings? (pg.5)</b>          |

27  
28 **Reporting**  
29

|                                        |     |                                     |                                                                                                                                                            |
|----------------------------------------|-----|-------------------------------------|------------------------------------------------------------------------------------------------------------------------------------------------------------|
| 30<br>31<br>32<br>33<br>34<br>35<br>36 | 29. | <b>Quotations presented</b>         | <b>Were participant quotations presented to illustrate the themes / findings? Was each quotation identified? e.g. <i>participant number</i> (pg.13-16)</b> |
| 37<br>38<br>39<br>40<br>41<br>42       | 30. | <b>Data and findings consistent</b> | <b>Was there consistency between the data presented and the findings? (pg.10-16)</b>                                                                       |
| 43<br>44<br>45<br>46<br>47             | 31. | <b>Clarity of major themes</b>      | <b>Were major themes clearly presented in the findings? (pg.10-16)</b>                                                                                     |
| 48<br>49<br>50<br>51<br>52             | 32. | <b>Clarity of minor themes</b>      | <b>Is there a description of diverse cases or discussion of minor themes? (pg.10-16)</b>                                                                   |

# BMJ Open

## Co-developing patient and family engagement indicators for health system improvement with healthcare system stakeholders: A consensus study

|                                 |                                                                                                                                                                                                                                                                                                                                                                                                                                                                                                                                                                                                                                                                                                                                                                                                                                                                                                                                                                                                                                                                                                                                                                                                                                            |
|---------------------------------|--------------------------------------------------------------------------------------------------------------------------------------------------------------------------------------------------------------------------------------------------------------------------------------------------------------------------------------------------------------------------------------------------------------------------------------------------------------------------------------------------------------------------------------------------------------------------------------------------------------------------------------------------------------------------------------------------------------------------------------------------------------------------------------------------------------------------------------------------------------------------------------------------------------------------------------------------------------------------------------------------------------------------------------------------------------------------------------------------------------------------------------------------------------------------------------------------------------------------------------------|
| Journal:                        | <i>BMJ Open</i>                                                                                                                                                                                                                                                                                                                                                                                                                                                                                                                                                                                                                                                                                                                                                                                                                                                                                                                                                                                                                                                                                                                                                                                                                            |
| Manuscript ID                   | bmjopen-2022-067609.R1                                                                                                                                                                                                                                                                                                                                                                                                                                                                                                                                                                                                                                                                                                                                                                                                                                                                                                                                                                                                                                                                                                                                                                                                                     |
| Article Type:                   | Original research                                                                                                                                                                                                                                                                                                                                                                                                                                                                                                                                                                                                                                                                                                                                                                                                                                                                                                                                                                                                                                                                                                                                                                                                                          |
| Date Submitted by the Author:   | 15-Dec-2022                                                                                                                                                                                                                                                                                                                                                                                                                                                                                                                                                                                                                                                                                                                                                                                                                                                                                                                                                                                                                                                                                                                                                                                                                                |
| Complete List of Authors:       | Santana, Maria-Jose; University of Calgary, Community Health Sciences; Canadian Institutes of Health Research, Alberta Strategy for Patient-Oriented Research (SPOR) SUPPORT Unit<br>Ahmed, Sadia; University of Calgary Cumming School of Medicine, Pediatrics; Canadian Institutes of Health Research, Alberta Strategy for Patient-Oriented Research (SPOR) SUPPORT Unit<br>Fairie, Paul; University of Calgary, Community Health Sciences; Canadian Institutes of Health Research, Alberta Strategy for Patient-Oriented Research (SPOR) SUPPORT Unit<br>Zelinsky, Sandra; University of Calgary, Department of Community Health Sciences; Canadian Institutes of Health Research, Alberta Strategy for Patient-Oriented Research (SPOR) SUPPORT Unit<br>Wilkinson, Gloria; Alberta Health Services, Strategic Clinical Networks<br>McCarron, Tamara; University of Calgary, Community Health Sciences<br>Mork, Mikie; Alberta Health Services, Strategic Clinical Networks<br>Patel, Jatin; Alberta Health Services, Strategic Clinical Networks<br>Wasylak, Tracy; Alberta Health Services, Strategic Clinical Networks™; Canadian Institutes of Health Research, Alberta Strategy for Patient-Oriented Research (SPOR) SUPPORT Unit |
| <b>Primary Subject Heading</b>: | Health services research                                                                                                                                                                                                                                                                                                                                                                                                                                                                                                                                                                                                                                                                                                                                                                                                                                                                                                                                                                                                                                                                                                                                                                                                                   |
| Secondary Subject Heading:      | Qualitative research                                                                                                                                                                                                                                                                                                                                                                                                                                                                                                                                                                                                                                                                                                                                                                                                                                                                                                                                                                                                                                                                                                                                                                                                                       |
| Keywords:                       | QUALITATIVE RESEARCH, STATISTICS & RESEARCH METHODS, COVID-19                                                                                                                                                                                                                                                                                                                                                                                                                                                                                                                                                                                                                                                                                                                                                                                                                                                                                                                                                                                                                                                                                                                                                                              |
|                                 |                                                                                                                                                                                                                                                                                                                                                                                                                                                                                                                                                                                                                                                                                                                                                                                                                                                                                                                                                                                                                                                                                                                                                                                                                                            |

SCHOLARONE™  
Manuscripts

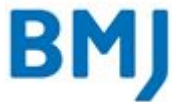

I, the Submitting Author has the right to grant and does grant on behalf of all authors of the Work (as defined in the below author licence), an exclusive licence and/or a non-exclusive licence for contributions from authors who are: i) UK Crown employees; ii) where BMJ has agreed a CC-BY licence shall apply, and/or iii) in accordance with the terms applicable for US Federal Government officers or employees acting as part of their official duties; on a worldwide, perpetual, irrevocable, royalty-free basis to BMJ Publishing Group Ltd ("BMJ") its licensees and where the relevant Journal is co-owned by BMJ to the co-owners of the Journal, to publish the Work in this journal and any other BMJ products and to exploit all rights, as set out in our [licence](#).

The Submitting Author accepts and understands that any supply made under these terms is made by BMJ to the Submitting Author unless you are acting as an employee on behalf of your employer or a postgraduate student of an affiliated institution which is paying any applicable article publishing charge ("APC") for Open Access articles. Where the Submitting Author wishes to make the Work available on an Open Access basis (and intends to pay the relevant APC), the terms of reuse of such Open Access shall be governed by a Creative Commons licence – details of these licences and which [Creative Commons](#) licence will apply to this Work are set out in our licence referred to above.

Other than as permitted in any relevant BMJ Author's Self Archiving Policies, I confirm this Work has not been accepted for publication elsewhere, is not being considered for publication elsewhere and does not duplicate material already published. I confirm all authors consent to publication of this Work and authorise the granting of this licence.

Co-developing engagement indicators – *BMJ Open* submission.

# Co-developing patient and family engagement indicators for health system improvement with healthcare system stakeholders: A consensus study

## Author list

Maria J. Santana<sup>1,2,3</sup>, Sadia Ahmed<sup>1,2</sup>, Paul Fairie<sup>2,3</sup>, Sandra Zelinsky<sup>2,3</sup>, Gloria Wilkinson<sup>4</sup>, Tamara L. McCarron<sup>3</sup>, Mikie Mork<sup>4</sup>, Jatin Patel<sup>4</sup>, Tracy Wasylak<sup>4,5,6</sup>

<sup>1</sup>Department of Paediatrics, Cumming School of Medicine, University of Calgary, Calgary, Alberta, Canada

<sup>2</sup>Alberta Strategy for Patient-Oriented Research (SPOR) SUPPORT Unit Patient Engagement Team

<sup>3</sup>Department of Community Health Sciences, Cumming School of Medicine, University of Calgary, Calgary, Alberta, Canada

<sup>4</sup>Strategic Clinical Networks, Alberta Health Services, Calgary, Alberta, Canada

<sup>5</sup>Alberta Strategy for Patient-Oriented Research (SPOR) SUPPORT Unit Learning Health System Team

<sup>6</sup> Faculty of Nursing, University of Calgary

Corresponding author:

Dr. Maria J. Santana

[mjsantan@ucalgary.ca](mailto:mjsantan@ucalgary.ca)

Word Count: 5,090

Keywords: patient engagement, surveys and questionnaires, health care systems, patient-oriented research, consensus

## Article Summary

### Strengths and limitations

- The consensus process utilized a participatory approach, by engaging diverse groups of experienced stakeholders, including patient and community advisors and health system staff and leadership
- We used a modified Delphi consensus process to co-develop a set of indicators to measure patient engagement in health research and system transformation for a provincial health system.
- This particular specific set of indicators has not yet been validated or implemented.



**Abstract**

**Objective** To develop a set of patient and family engagement indicators (PFE-Is) for measuring engagement in health system improvement for a Canadian provincial health delivery system through an evidence-based consensus approach.

**Design** This mixed-method, multi-phase project included: (1) identification of existing measures of patient and family engagement through a review of the literature and consultations with a diverse provincial council of patients, caregivers, community members, and researchers. The Public and Patient Engagement Evaluation Tool (PPEET) was selected; (2) consultations on relevance, acceptability and importance with patient and family advisors, and staff members of Alberta Health Services' Strategic Clinical Networks™. This phase included surveys and one-on-one semi structured interviews aimed to further explore the use of PPEET in this context. Findings from the survey and interviews informed the development of PFE-Is; (3) a Delphi consensus process using a modified RAND/UCLA Appropriateness Method to identify and refine a core set of PFE-Is.

**Participants** The consensus panel consisted of patients, family members, community representatives, clinicians, researchers, and healthcare leadership.

**Results** From an initial list of 33 evidence-based PFE-Is identified, the consensus process yielded 18 final indicators. These PFE-Is were grouped into seven themes: communication, comfort to contribute, supports needed for engagement, impact and influence of engagement initiative, diversity of perspectives, respectful engagement, and working together indicators.

**Conclusions** This group of final patient, family and health system leaders informed indicators can be used to measure and evaluate meaningful engagement in health research and system transformation. The use of these metrics can help to improve the quality of patient and family engagement to drive health research and system transformation.

## 78 Background

79  
80 Person-centred health system improvement and transformation requires the involvement of patients  
81 and families to shape system priorities and inform care delivery and outcomes.(1) Recent evidence has  
82 shown that engaging patients in health system transformation can enhance service delivery and drive  
83 system improvement.(2)

84  
85 While there have been efforts to advance patient engagement in health research and health system  
86 transformation, there are currently few co-developed, system-embedded sets of indicators to evaluate  
87 patient engagement and its impact on this transformation.

88  
89 Alberta Health Services (AHS) is the largest province-wide health delivery system authority in the  
90 Canadian province of Alberta.(3) Within AHS, the Strategic Clinical Networks™ (SCNs) address system-  
91 wide gaps in care, work together to get evidence into practice, improve patient outcomes and  
92 experience, and to support continuous quality improvement.(4) The SCNs are multi-stakeholder teams  
93 that are comprised of clinicians, patient and family advisors, operational leaders, researchers, policy  
94 makers and community partners.(4, 5)

95  
96 As of June 2022, the 11 SCNs aim to advance improvements in specific areas of health: (1) Bone & Joint  
97 Health, (2) Cancer, (3) Cardiovascular Health & Stroke, (4) Critical Care, (5) Diabetes, Obesity & Nutrition,  
98 (6) Digestive Health, (7) Emergency, (8) Maternal Newborn Child & Youth, (9) Medicine, (10)  
99 Neurosciences, Rehabilitation & Vision and (11) Surgery; and within 5 Integrated Provincial programs:  
100 (1) Addiction & Mental Health, (2) Seniors & Continuing Care, (3) Primary Health Care, (4) Population  
101 and Public Health and (5) Indigenous Wellness Core.

102  
103 Each SCN works to actively engage patients and families in priority setting and co-designing solutions to  
104 improve patient experiences and quality of care. The Patient Engagement Reference Group (PERG)  
105 includes patients and public that engaged regularly in quality improvement and research projects within  
106 the 11 SCNs and the 5 Provincial Integrated Programs.(6) The current annual survey, deployed by the  
107 SCN Patient & Family Engagement team, does not measure patient engagement but rather the overall  
108 performance or satisfaction of participation. Additionally, engagement efforts are inconsistent across  
109 networks and often uncoordinated.(7) Developing indicators will enable AHS and the SCNs to be able to  
110 effectively measure patient engagement across networks. These measures will lend themselves to  
111 assessing impact with respect to effective engagement of patient and family advisors.

112  
113 Our objective for this project was to address this gap by developing a set of evidence-based patient and  
114 family engagement indicators (PFE-Is) that were informed and prioritized by patient and family advisors  
115 (PFAs) in the context of a large and complex fully integrated provincial health system to measure  
116 meaningful patient engagement at the system level.

## 117 118 Methods

119  
120 This mixed method study is a multi-phased patient-oriented research study that was informed by recent  
121 literature on patient engagement in health systems,(8, 9) consultations with our provincial network of  
122 Albertans (Albertans4HealthResearch Collaborative Council),(10) a survey and interviews with AHS SCN  
123 staff, leadership and PFAs, followed by a modified Delphi consensus generating process(11) to identify  
124 indicators to be used by the AHS SCNs to measure patient and family engagement in their initiatives to  
125 transform health care system in Alberta (Figure 1).

Co-developing engagement indicators – *BMJ Open* submission.

126

127 *Patient and Public Involvement*

128

129 This study is informed by the Canadian Institutes of Health Research (CIHR) Strategy for Patient-Oriented  
 130 Research (SPOR) Patient Engagement Framework, which states that patients are active partners in  
 131 health research.(12) The four guiding principles of the framework are inclusiveness, support, mutual  
 132 respect, and co-build.(12) We consulted with patients and family advisors with diverse lived experience  
 133 as active collaborators through a participatory approach—doing research ‘with’ rather than ‘on’  
 134 them.(12) The team included two patient partners, people living with chronic conditions (GW and SZ),  
 135 both of whom are graduates of the Patient and Community Engagement Research (PaCER) program(13)  
 136 from the University of Calgary that trains citizens with lived experiences of a health condition how to  
 137 conduct research projects by, for, and with patients. GW and SZ also lead patient engagement groups  
 138 and have extensive experience working on healthcare research and quality improvement projects and at  
 139 governance level in the healthcare system.(6, 14) GW and SZ were involved in the planning of the  
 140 project through working with the team members, SCN leadership and PERG to design the rollout of the  
 141 project, providing feedback on the study proposal, co-conducting the project, and co-developing the  
 142 manuscript.

143

144 **Study participants and recruitment**

145 The study population includes a diverse group of SCN leadership (individuals responsible for the  
 146 organizational requirements for engagement activities- Scientific Directors (SD), Senior Provincial  
 147 Directors (SPD), Senior Provincial Officers (SPO), Senior Medical Directors (SMD)), SCN Staff (Assistant  
 148 Scientific Directors (ASD), Executive Directors (ED), Managers, Staff Liaisons, Senior Consultants) and  
 149 (PFAs) within the SCNs.

150

151 Recruitment was supported by members of the research team (GW, MM, JP, and TW), working with and  
 152 leading the AHS SCNs. Participants were invited to complete a survey and semi-structured interview.  
 153 SCN leadership, SCN staff, and PFAs were also invited to participate in a modified Delphi consensus  
 154 process. Participants are drawn from the same pool for all the phases, however since the survey is  
 155 anonymous we did not confirm with all interview respondents or Delphi consensus participants whether  
 156 they completed the survey.

157

158 The University of Calgary Conjoint Health Research Ethics Board (CHREB) has approved this project  
 159 (REB20-1822).

160

161 **Patient and public involvement: A multi-phase approach**

162

163 The development of these indicators occurred over three phases, each involving significant patient and  
 164 public engagement.

165

166 Phase 1: Selecting the patient and family engagement tool

167 Phase 2: Stakeholder consultations including a survey and follow up with interviews

168 Phase 3: Modified Delphi Panel

169

170 *Phase 1: Selecting the measure*

171

172 This phase includes three steps.

173

174 **Step 1:** We identified patient engagement evaluation measures. A recently published Systematic  
175 Review(15) identified a number of validated patient engagement evaluation survey tools including;  
176 PEIRS (Patient Engagement In Research Scale),(16) PPEET (Public and Patient Engagement Evaluation  
177 Tool)(17) and WE-ENACT (Ways of Engaging- ENgagement ACTivity Tool).(18)

178  
179 **Step 2:** We presented the identified patient engagement evaluation measures to our provincial council,  
180 the Albertans4HealthResearch Collaborative Council. Members of the council appreciated the scope and  
181 depth of the PPEET, as it captured the evaluation of patient and family engagement from the  
182 perspectives of different stakeholders (patient and family advisors, staff members, and organization  
183 leaders).(17)

184  
185 **Step 3:** After identifying and selecting the measure, the PPEET was compared to existing PFA  
186 engagement measures used by SCNs. This step ensured that existing efforts aligned with the  
187 development of the final core of indicators.

188  
189 Public and Patient Engagement Evaluation Tool (PPEET)(17) includes three types of questionnaires that  
190 can be used to assess public and patient engagement in health research and at health system level. The  
191 three questionnaires are:

- 192 1. A participant questionnaire for patient partners and staff members on their experiences  
193 working together in engagement initiatives. There are two versions available: one evaluating  
194 one-time engagements and another evaluating on-going/long-term engagements.
- 195 2. A project questionnaire that reviews and assesses three components of the process of  
196 engagement at health system level including the planning, execution, and impact of the  
197 engagement.
- 198 3. An organization questionnaire assesses how engagement is conducted within organizations.

199  
200 Questionnaires 1 and 3 of the PPEET were chosen for phase 2 as they aligned best with the purposes of  
201 evaluating patient and family engagement within the SCNs.

### 202 203 *Phase 2: Stakeholder consultations*

204  
205 This phase included two steps, an electronic PPEET survey, and semi-structured interviews with SCN  
206 staff, leadership and PFAs.

207  
208 **Step 1:** Individuals from SCNs were contacted and invited to complete the PPEET as an anonymous on-  
209 line survey. This survey was populated into Qualtrics Software(19) for ease of use and widespread  
210 distribution. The aim was to assess the utility of the PPEET in capturing the experiences of participants in  
211 working together within their SCNs; as well as gathering potential barriers and facilitators in  
212 engagement in health research and system transformation.

213 Survey results were descriptively summarized and categorized according to the key areas of  
214 engagement: communication and supports for participation, sharing your views and perspectives, and  
215 impacts and influence of the engagement initiative. Frequencies were also reported.

216  
217 **Step 2:** After completing the online survey, respondents were invited to a semi-structured interview.  
218 Interviews were conducted with a select number of SCN PFAs, leadership and staff members via a video-  
219 conferencing platform (e.g. Zoom) or by telephone. The purpose of conducting the interviews was for  
220 participants to expand on their patient engagement experiences working within the SCNs, and to gain an  
221 in-depth understanding of the barriers and facilitators to engagement in health research and system

222 transformation. The interview guide was co-developed with patient and family partners and research  
223 team members (APPENDIX I). The semi-structured interviews were conducted by members of the  
224 research team (conducted by SZ, GW, SA, TM, qualitative research background).

225  
226 The interviews were audio recorded, transcribed verbatim, and thematically analyzed, with deductive  
227 and inductive coding strategies.(20) Qualitative researcher (SA) followed the six-step thematic analysis  
228 Braun & Clarke method,(21) and had peer debriefing sessions at different stages of the analysis with MS  
229 to discuss themes and subthemes identified. After organizing codes into themes, they were presented  
230 back to the research team for feedback.

231  
232 PFE-Is were drafted from the PPEET survey and qualitative interviews for the consensus process.

### 233 234 *Phase 3: Delphi Consensus Process*

235  
236 Consensus methods are considered an effective tool for facilitating decision-making when there is  
237 insufficient information or when there is contradictory information.(22) The RAND/UCLA  
238 Appropriateness Method was used as a guide for the consensus process.(11) A consensus panel  
239 consisted of a diverse group of eight PFAs, five Scientific Directors, ten Assistant Scientific  
240 Directors/Managers/Staff liaisons.

241  
242 The consensus process included three rounds. Round one was conducted via an electronic survey, round  
243 two via videoconference, and round three was completed via an electronic survey.

244  
245 **Round One:** Using a modified Delphi technique,(11) panelists ranked each of the PFE-Is criteria  
246 according to a 9-point scale scoring as not relevant/to be discarded (1-3); consider more discussion (4-6)  
247 and relevant/accepted (7-9). Panelists were also given the opportunity to provide written comments  
248 and suggestions. Results from this phase were compiled and shared prior to the virtual face-to face  
249 Round 2.

250  
251 **Round Two:** the panel and moderators convened over 2 hours via zoom. Moderators shared the results  
252 of the first round and facilitated a workshop noting any areas of disagreement indicated by the ratings  
253 and answered any questions about the process. The group deliberated, until agreement on the patient  
254 and family engagement indicators was achieved. Two research team members took notes to capture  
255 modifications made to the indicators and discussions from the consensus meeting. The indicators (after  
256 modifications) were presented to the panelists for a final round of voting.

257  
258 **Round Three:** The discussed PFE-Is were refined based on the discussions and consensus that happened  
259 during Round Two. These PFE-Is were voted on 'overall importance' as keep or discard using an  
260 electronic survey.

### 261 262 263 **Scale**

264  
265 Panelists used a 9-point rating scale. Ratings of 1-3 indicated not relevant/to be discarded; 4-6 if more  
266 discussion was needed; 7-9 as relevant/accepted. PFE-Is were accepted when 75% of the panelist's  
267 ratings were 7,8,9 without disagreement on the scale. Disagreement was declared when 5 or more than  
268 5 panelists rated the indicator in the top and bottom parts of the scale (1-3 or 7-9).

269

270 The rating criteria provided to the panelists is displayed in Table 1. Panelists used these criteria to rate  
 271 PFE-Is through the Delphi process.

272  
 273 **Table 1. Rating criteria**

| Criteria                                       | Definition                                                                                                                                                                                                                                                                                                                                                                                                                                                                                                                                                                                                                                                                                              |
|------------------------------------------------|---------------------------------------------------------------------------------------------------------------------------------------------------------------------------------------------------------------------------------------------------------------------------------------------------------------------------------------------------------------------------------------------------------------------------------------------------------------------------------------------------------------------------------------------------------------------------------------------------------------------------------------------------------------------------------------------------------|
| <b>Overall importance</b>                      | <p>This overall rating will be used to determine how important it is to measure and track this indicator for patient and family engagement within the SCNs</p> <p>A high score on this criterion indicates that compared with other indicators, this indicator is very important for measurement of patient and family engagement within the SCNs</p> <p>A low score on this criterion indicates that the indicator is not as important compared to the other indicators for measuring patient and family engagement within the SCNs</p> <p>When rating this indicator, consider how important is this indicator to you or your organization in promoting meaningful patient and family engagement.</p> |
| <b>Impact on Patient and Family Engagement</b> | <p>This rating will be used to determine whether this indicator will have a big impact on the engagement of patients and families within the SCNs</p> <p>A high score on this criterion indicates that compared with other indicators, this indicator has a big impact on the engagement of patients and families within the SCNs</p> <p>A low score on this criterion indicates that compared with other indicators, this indicator does not have a big impact on the engagement of patients and families within the SCNs</p> <p>Improvements on this indicator will mean improved engagement of patient and family advisors</p>                                                                       |
| <b>Actionable by SCNs</b>                      | <p>This indicator reflects an area where improvements can be made. It can provide information to improve the engagement of patient and family advisors</p> <p>A high score on this criterion indicates that compared with other indicators, there is a big opportunity to change the results for this indicator within the SCNs</p> <p>A low score on this criterion indicates that compared with other indicators, there is not a big opportunity to change the results for this indicator within the SCNs</p> <p>This indicator could be measured to improve patient and family engagement within the SCNs, without too much difficulty</p>                                                           |
| <b>Interpretability</b>                        | <p>This indicator provides clear information that is easy to communicate to stakeholder groups, including patient and family advisors.</p>                                                                                                                                                                                                                                                                                                                                                                                                                                                                                                                                                              |

Co-developing engagement indicators – *BMJ Open* submission.

|                  |                                                                                                                                                                                                                                                                                                                                                                                                                                                                    |
|------------------|--------------------------------------------------------------------------------------------------------------------------------------------------------------------------------------------------------------------------------------------------------------------------------------------------------------------------------------------------------------------------------------------------------------------------------------------------------------------|
|                  | <p>A high score on this criterion indicates that compared with other indicators, this indicator is easy to communicate to different audiences, with little explanation</p> <p>A low score on this criterion indicates that compared with other indicators, this indicator is more difficult to communicate to different audiences with little explanations</p>                                                                                                     |
| <b>Relevance</b> | <p>This indicator addresses areas of major importance or concern related to patient and family engagement within the SCNs</p> <p>A high score on this criterion indicates that the indicator is very relevant to patient and family advisors, and the strategic clinical networks</p> <p>A low score on this criterion indicates that the indicator is not as relevant as other indicators to patient and family advisors, and the strategic clinical networks</p> |

274

## 275 Results

276

277 The results of the three phases are described by phase.

278

### 279 Phase 1.

280

281 The AB4HR council members were consulted on which tool to utilize for measuring patient and family  
 282 engagement. The criteria for selecting the initial tool was that the tool had to be free to use, relevant,  
 283 actionable, measure engagement prospectively and from all members of the team and important to  
 284 assess the engagement in health research and other initiatives informed by patients and family advisors.  
 285 The council members completed the PPEET to provide their feedback on what was being asked within  
 286 the survey, and council members found the PPEET met all the criteria.

287

### 288 Phase 2a

289

290 The online survey was emailed to 175 patient and family advisors, 69 SCN staff members, and 49 SCN  
 291 leadership members. 96 participants responded, including 51 PFAs, 31 SCN staff, and 14 SCN leadership.  
 292 PFE-Is were then drafted based on the questions from the PPEET survey.

293

294 In general, there was some consistency in the responses. Most patient and family advisors  
 295 agreed/strongly agreed that they:

296

- have a clear understanding of the purpose of the SCNs they are involved in (94%)
- have supports available to contribute to the SCNs projects (92%)
- have enough information to be able to carry out their role in the specific projects (81%)
- can express their views freely when working in projects (96%)
- are confident the SCNs take the feedback provided by patient and family advisors into consideration (81%)

300

301 Similarly, most or all SCN staff agreed/strongly agreed that they:

302

- have a clear understanding of the purpose of engaging patient and family advisors in the SCNs (100%)

303

304

305

306

307

308

309

Co-developing engagement indicators – *BMJ Open* submission.

- 306 • have supports and information available to effectively engage with patient and family advisors  
 307 (87%)  
 308 • are able to express their views freely (86%)  
 309 • SCNs take the feedback of patient and family advisors into consideration (100%)  
 310 • felt the involvement of patient and family advisors make a difference in the work of the SCNs  
 311 (100%)

312  
 313 SCN leadership responded to a different module of the PPEET that focused on policy and practices that  
 314 support patient and family advisor engagement, participatory culture, influence and impact, and  
 315 collaboration and common purpose.

316  
 317 Most SCN leadership agreed:

- 318 • that the SCNs have an explicit strategy and framework for patient and family advisor  
 319 engagement (86%)  
 320 • the SCNs have explicit strategies for recruiting patient and family advisors, depending on the  
 321 engagement initiative (79%)  
 322 • a commitment to the principles and values of patient and family advisor engagement is found in  
 323 key SCN documents (e.g., transformational roadmaps, etc.) (93%)  
 324

325 However, there were some mixed responses on the following:

- 326 • 50% of respondents were neutral on the statement that the resources available for patient and  
 327 family advisor engagement is adequate (43% agreed/strongly agreed, and 7% disagreed.)  
 328 • 43% of respondents agreed/strongly agreed to SCNs preparing reports that summarize the  
 329 contributions from patient and family advisor engagement initiatives (36% of respondents were  
 330 neutral and 21% disagreed.)  
 331 • The statement “Comprehensive patient and family engagement training and materials are  
 332 available to support staff who are leading and supporting these activities.” had 42% responding  
 333 neutral, 41% agreeing/strongly agreeing, and 17% disagreeing.  
 334

335 Some of the SCN leadership that responded neutral for some statements indicated in the comments  
 336 that this was due to lack of awareness on specific activities and resources. The results indicate variation  
 337 among the 11 SCNs and 5 Provincial Programs in how patient and family engagement is conducted and  
 338 reported.  
 339

340 Phase 2b - Interviews were conducted with 26 individuals including 13 with PFAs and 6 SCN staff and 7  
 341 SCN leadership. Interviews ranged from 25 to 94 mins. Figure 2 displays an overview of the themes and  
 342 subthemes, and Table 2 provides more details on the themes, subthemes, and associated quotes. The  
 343 identified themes highlighted additional considerations in patient and family engagement and additional  
 344 PFE-Is, such as mentorship for PFAs, capacity building opportunities for PFAs and SCN staff members in  
 345 POR (training/orientation), and virtual engagement of PFAs.  
 346

### 347 Improving Patient Engagement within the SCNs

348  
 349 Both PFAs and SCN staff recognized the need for inclusive strategies for recruitment and retainment, to  
 350 involve various other patients in health research and within SCNs. Some SCN staff expressed difficulties  
 351 with recruiting new PFAs, and retaining current advisors. Strategies mentioned by some staff included



352 the importance of reaching out to clinical, special interest, and non-profit groups for support in  
353 recruiting PFAs, bringing awareness to what a patient advisor is, and utilizing social media.

354

355 Some staff also noted some barriers to recruitment including the:

- 356 • onboarding process for the organization, which can be extensive for engagement especially  
357 those required for one-time or for a limited time.
- 358 • COVID-19 pandemic and how it impacted the time people have available.
- 359 • lack of compensation available for patient advisors which may exclude some advisors who  
360 represent marginalized and hard to reach communities (e.g. unhoused individuals).

361

362 Most PFAs who had felt supported in the engagement activities, mentioned having a strong relationship  
363 with their SCN team. SCN Leadership and staff also discussed their patient engagement strategy and  
364 how it evolved over time. Staff and Leadership felt supported in being able to carry out patient  
365 engagement in their work. To improve patient engagement within the SCN, participants highlighted  
366 various supports for patient engagement that are required to be consistent within the SCNs: resources  
367 about how to engage with patients and working together, mentorship for PFAs, capacity building  
368 opportunities for both SCN staff and patient and family advisors such as training and/or orientation.  
369 Some participants also discussed whether compensation for engagement would be needed as an  
370 acknowledgement of the time and contributions of PFAs. Finally, participants indicated a vital  
371 component for working together successfully included respectful engagement and the sincerity of those  
372 engaging patients. In various committees, participants indicated excellent partnerships were key to  
373 feeling respected and accordingly that they felt like they could contribute to the SCN.

374

375 Some participants highlighted the need for PFAs to be involved in decision-making processes through  
376 early engagement at the conception of the project and including PFAs in more leadership positions such  
377 as co-chairing or co-leading committees.

378

### 379 **Communication with PFAs**

380

381 Some PFAs emphasized needing clear and timely communication about the status of projects, e.g. when  
382 projects were being implemented, whether projects were moving forward, and updates on the general  
383 work of the SCN. Participants emphasized the importance of setting clear expectations for engagement  
384 activities and for the role of a PFA. Some PFAs described their role within the SCNs as advising on  
385 projects, acting as leaders or members in patient advisory groups, being invited to share their  
386 stories/perspectives on their healthcare experiences, and providing input on meeting agendas.  
387 However, there were also some PFAs who mentioned lacking clarity on their role within the SCN when  
388 they had initially joined the network.

389

390 Some SCN staff discussed some challenges in managing expectations of PFAs (regarding timeline of the  
391 project, or the priorities of the network), which may have not aligned with the expectations of the PFAs.  
392 Some staff expressed how they had to communicate to patients the difference between advisor versus  
393 advocate as the roles are different within the SCNs, and have the potential to lead to differing priorities.  
394 One staff member discussed developing a 'parking lot' to provide a safe space in bringing up topics of  
395 concern and interest to PFAs, but not aligning with current priorities of the SCN. The aim of this idea is  
396 to ensure PFAs' ideas are not lost but recognized for the potential to address at a later date.

397

### 398 **Work Environment**

399

1  
2  
3 400 Most PFAs described feeling comfortable in being able to contribute in meetings with other stakeholders  
4 401 and still feeling engaged in virtual meetings and projects, and adapting well to working in a virtual  
5 402 setting. There were few PFAs who expressed frustration with lack of patient engagement in the SCNs  
6 403 during COVID, and some who had stepped down from their PFA position as a result.  
7 404 Almost all SCN staff also mentioned working virtually with SCN teams including PFAs have been a  
8 405 positive experience (such as alleviating burden from travel or facilitating engagement). However, both  
9 406 SCN staff and PFAs mentioned missing the personal connection and networking aspect of in-person  
10 407 meetings. Other concerns with virtual engagement were that it would be more difficult for new advisors  
11 408 to be engaged in a virtual environment, and some advisors may be uncomfortable with technology and  
12 409 encounter connection issues.  
13 410

### 14 411 **Motivations to Sustain Engagement**

15 412  
16 413 Most PFAs mentioned their reason for joining and staying was to have an impact on the healthcare  
17 414 system, and to feel like their contributions mattered.  
18 415

19 416 There were mixed responses from PFAs on whether they felt acknowledged for their contributions and  
20 417 valued as team members. Some PFAs felt valued as members of their SCNs, and detailed ways in which  
21 418 they felt acknowledged for their contributions. There were also some PFAs who spoke about instances  
22 419 in which they felt they were low priority for the SCNs, or felt their involvement was tokenistic. Some  
23 420 PFAs also described how they valued learning from their SCN teams, learning about research, their  
24 421 conditions, and the healthcare system. For some PFAs, meeting people and building relationships was  
25 422 valuable in their engagement within the SCNs, and a reason for them to continue to stay involved.  
26 423  
27 424  
28 425  
29 426  
30 427  
31 428  
32 429  
33 430  
34 431  
35 432  
36 433  
37 434  
38 435  
39 436  
40 437  
41 438  
42 439  
43 440  
44 441  
45 442  
46 443  
47 444  
48 445  
49 446  
50 447

448 Table 2. Themes, sub-themes and selected quotes.

| Theme & subthemes                                                                                                                                        | Quote                                                                                                                                                                                                                                                                                                                                                                                                                                                                                                                                                                                                                                                                                                                                                                                                                                                                                                                                                                                                                                                                                                                                                                                            |
|----------------------------------------------------------------------------------------------------------------------------------------------------------|--------------------------------------------------------------------------------------------------------------------------------------------------------------------------------------------------------------------------------------------------------------------------------------------------------------------------------------------------------------------------------------------------------------------------------------------------------------------------------------------------------------------------------------------------------------------------------------------------------------------------------------------------------------------------------------------------------------------------------------------------------------------------------------------------------------------------------------------------------------------------------------------------------------------------------------------------------------------------------------------------------------------------------------------------------------------------------------------------------------------------------------------------------------------------------------------------|
| <p data-bbox="40 268 337 367"><b>Improving Patient Engagement within the SCNs</b></p> <p data-bbox="40 409 337 483">Inclusive recruitment strategies</p> | <p data-bbox="337 268 1575 409">“I sent a letter in about two years ago to Dr. and I said, “you know, I've really enjoyed being involved but, you know, you need to get more members of the public involved, more than just me.” ..., not 20 but you know, maybe- they probably have 2 or 3 now, members of the SCN, or maybe more...part of the core committee, so I think...those are the things that I would potentially change” (PFA3)</p> <p data-bbox="337 451 1575 693">“we have a real passionate group, right? And after two years I feel like a little bit of momentum has dropped. But I mean it was COVID for goodness sakes, right? ... we did recruit four new advisors in January so we tried anyways. But we still—we want to get a sweet spot of about 15 where at last half of them attend a meeting, right, whereas right now if we have 11 then we only have five or six attending... And I mean not that that's bad it's just, you want more voices, right? And people aren't responding, they're not great at responding to emails. Even though we send out lots of opportunities sometimes it's just that reach out directly to the person that works best.” (Staff4)</p> |
| <p data-bbox="40 724 337 798">Supports for engagement</p>                                                                                                | <p data-bbox="337 724 1575 1018">“one of the first things I did was develop a resource for Skype because our—I think AHS either was in the process of or didn't have one that I felt was kind of user friendly. So I developed that and actually shared that amongst the networks to say hey, here I have this Skype for patients and families to use. We developed an orientation PowerPoint, so it really—once they've been fully onboarded then we do this orientation and it's probably 45 minutes presentation and discussion and questions. And it really talks about all the three areas in the network ...and it introduces who the network is all this kind of main subject areas... The other thing we did was a resource, it's like a dictionary...a glossary of terms for our network.” (Staff4)</p>                                                                                                                                                                                                                                                                                                                                                                                 |
| <p data-bbox="40 1050 337 1155">Views on Respectful Engagement</p>                                                                                       | <p data-bbox="337 1050 1575 1260">“the ones [that] are tokenism, and that decisions had already been made and they were just looking to tick a box on a form to say “yes, we had patient engagement”. And although there was some effort...I can spot a project to nowhere and I'm just a bobblehead as a patient advisor after one meeting,...At the beginning had more of those type of experiences, and as you gain experience and knowledge of how AHS works, you know to pick and choose what projects you think are realistic and that will actually move forward.” (PFA7)</p>                                                                                                                                                                                                                                                                                                                                                                                                                                                                                                                                                                                                             |
| <p data-bbox="40 1291 337 1365">Involvement in decision making</p>                                                                                       | <p data-bbox="337 1291 1575 1543">“the other place I think that I want to get to is, as an SCN and not just me personally, is to really kind of really push the envelope more in terms of our involvement of our patient advisors as leaders within the SCN. So to really try to get them to be a bit more leading in terms of bringing their ideas forward and getting sort of at the end of that IAP2 spectrum really coming up with the ideas and being able to run with them and work on it from that perspective. And I think some people are ready to do that, especially the PACER grads. But I think I'd like to see the whole community move that way.” (SCNLead7)</p>                                                                                                                                                                                                                                                                                                                                                                                                                                                                                                                  |
| <p data-bbox="40 1585 337 1659"><b>Communication with PFAs</b></p> <p data-bbox="40 1659 337 1732">Role clarity &amp; expectations</p>                   | <p data-bbox="337 1585 1575 1795">“there was a long-time patient or family advisor who wanted the network to work on something that he was interested in. But it didn't align with operational priorities so it never rose to the top...We can't do everything and for him to be meaningfully engaged... we and he decided that how he contributed to the network would change. And he came more focused on other contributions to research and to providing inputs occasionally to surveys that we would do, and certainly continuing to receive communications, etc. But when there isn't that alignment, we can't force it.” (SCNLead2)</p>                                                                                                                                                                                                                                                                                                                                                                                                                                                                                                                                                   |
| <p data-bbox="40 1837 337 1902">Communication Strategies</p>                                                                                             | <p data-bbox="337 1837 1575 1902">“staff would call us to talk about the agenda... review the agenda...so we were really kept informed as to what was going on” (PFA6)</p>                                                                                                                                                                                                                                                                                                                                                                                                                                                                                                                                                                                                                                                                                                                                                                                                                                                                                                                                                                                                                       |

|                                                            |                                                                                                                                                                                                                                                                                                                                                                                                                                                                                                                          |
|------------------------------------------------------------|--------------------------------------------------------------------------------------------------------------------------------------------------------------------------------------------------------------------------------------------------------------------------------------------------------------------------------------------------------------------------------------------------------------------------------------------------------------------------------------------------------------------------|
| Work environment                                           | “I remember when I went to my very first meeting, I was so nervous because I thought like they would be like “you interlopers, what are you doing here,” kind of thing. I thought we would stand out and be like really weird, and it was completely the opposite. It was incredibly welcoming” (PFA2)                                                                                                                                                                                                                   |
| Comfort to contribute                                      | “I was on a side project...the person who was leading the project, ...would ask a question. And one time – one question, the physician would answer first...high up EMS people would answer, and then she would ask us as family patient advisors. The next question: she’d flip it and she’d ask the EMS guys first, then the family patient advisors, then the physician...Never have I felt more like an equal than I did on that project.” (PFA11)                                                                   |
| Adapting to virtual involvement due to COVID               | “it depends on the meeting, like once it's too big, you kind of lose people and everybody is drifting off, but for smaller engagement it's- it's actually very effective. It's good for the environment, because there's less travel, and it's good for infection control, because before the pandemic, if we were getting people together face-to-face, if one person decided to go with a cold, they probably would leave some of that virus behind. So, it's the future” (SCNLead4)                                   |
| Motivations to sustain engagement<br>Relationship-building | “I've also benefited from the relationships I've formed with people and from the respect I've gotten from that... it is satisfying to know that your voice is appreciated and that really is – really is the way – why I was involved and why I keep being involved with the research.” (PFA8)                                                                                                                                                                                                                           |
| Feeling valued                                             | “I wanted to commend the SCNs in their ability to make patients feel like superstars. You know, to help us recognize that we are as important as the head of Nephrology. And there's a huge ego boost in that and that ego boost is necessary in order to give people the confidence to speak up.” (PFA5)                                                                                                                                                                                                                |
| Learning opportunities                                     | “that's been the joy of the SCN as well. Is really learning. The physician and medical experience which I want more of, as well as hearing other patient partners and building that network. I've had this opportunity and I've always been a lifelong learner, so every time I attend a presentation, every time I'm part of an event, I'm learning more about research, I'm learning more about kidney function, but I'm learning more about people even more important to me, so it has been really valuable.” (PFA4) |
| Having an impact on the healthcare system                  | “I'll admit, I was a little – not suspicious, but fatalistic at first, thinking, yeah, will it make any difference? But the more I found that they really took patient complaints or suggestions positively, and I saw things actually being enacted that made a difference. It kept me going and eager to do more.” (PFA12)                                                                                                                                                                                             |

449

450

451

**Phase 3**

452

453

During phase 3, 23 participants (8 PFAs, 15 SCN staff members) arrived at consensus on the core PFE-Is over three rounds of discussions. They rated each indicator based on the following criteria: overall importance, impact on patient and family engagement, actionable by SCNs, interpretability, and relevance. (Figure 3).

454

455

456

457

458

At the end of the third round, seven different categories of PFE-Is were developed, including:

459

460

1. **Communication:** Assess whether enough information has been provided to PFAs to have an overall understanding of the SCNs and specifically their role.

461

462

2. **Comfort to Contribute:** Assess whether PFAs are comfortable in contributing within their SCNs, through expressing their views freely.

463

3. **Supports for Engagement:** Assess whether there are necessary supports available for patient and family engagement within the SCNs for PFAs and SCN staff.
4. **Impact and Influence of Engagement Initiative:** Assess whether PFAs and SCN staff agree that involvement of PFAs make a difference in the work of the SCNs, and that SCNs take the feedback provided by PFAs into consideration.
5. **Diversity of Perspectives:** Assess whether individuals engaging in SCN teams represent a broad range of perspectives
6. **Respectful Engagement:** Assess whether individuals engaging in SCN teams perceive the engagement as respectful and sincere to working together
7. **Working Together:** Assess whether PFAs work together with SCN staff to design, conduct, and disseminate SCN projects

Specifically, 33 PFE-Is were developed through phase 1 and phase 2 of this work. These 33 drafted indicators were presented to the panel for rating using the rating criteria: overall importance, impact on patient and family engagement, actionable by SCNs, interpretability, and relevance.

During the first round and based on final ratings, one indicator was discarded: Each SCN prepares reports that summarize the contributions from patient and family advisor engagement initiatives, as the overall importance was rated low.

During round 2, eight indicators were discarded by the panelists as these PFE-Is were perceived by the panelists as too broad and difficult to measure including: PFAs being meaningfully engaged virtually; PFAs have a supportive working environment to contribute to the engagement initiative; SCNs have mentorship opportunities for PFAs; Each SCN has an explicit strategy or framework for patient engagement; Each SCN is at the stage of established/making some progress in engagement with patient and family advisors; Each SCN has explicit strategies for recruiting patient and family advisors, depending on the engagement initiative; There are resources (documents, guidelines) available to SCN Staff for PFA engagement; The SCN is achieving its stated objectives.

Slight modifications were made to some of the indicators that were considered 'keep' such as clarity in the wording. For instance, the indicator "Clear understanding of the purpose of the SCN" was modified to include "SCN that I am a part of" to make it clear to respondents that the indicator is measuring the purpose of a specific SCN that the PFA belongs to, and not all the SCNs. Panelists also recommended breaking the 'working together' indicator into separate indicators to reflect the many ways PFAs work together with the SCNs. For instance, in the design of projects, conducting projects, and in the dissemination of projects.

Of the 24 indicators from round 2, eleven indicators were accepted by the panelists and 13 indicators needed to be refined by the panelists at the third round of voting. From round 3 of voting, six indicators were discarded by panelists: PFAs have received training on patient engagement (e.g. orientation to patient-oriented research); SCN staff have received training on patient engagement (e.g. orientation to patient-oriented research); The responsibilities related to patient engagement are clearly articulated in my job description; There are dedicated patient and family engagement leadership positions; AHS Resources for Patient Engagement are useful for partnering with patient and family advisors (answered by SCN staff); SCN staff work together with PFAs to disseminate SCN projects (e.g. co-presenting at conferences, sharing work widely) (answered by SCN staff)

A final core group of 18 indicators were accepted. The final indicators from this Delphi consensus generating process are displayed in Table 3. Certain indicators were developed based on previous

Co-developing engagement indicators – *BMJ Open* submission.

512 indicators (e.g. indicators 14-17), some indicators were developed after round 2, and then introduced  
513 again for voting in round 3. Details of the final indicators (numerator and denominator) are included in  
514 APPENDIX II.

515  
516 Table 3. Summary of consensus panel ratings on overall importance for the final 18 patient and family  
517 engagement indicators  
518

| Patient and Family Engagement Indicators                                                                  | Round 1 remote panel rating (Median score on 9-point scale and (IQR)) | Round 2 online consensus meeting decision                                          | Round 3 remote panel decision (% of panelists voting to keep indicator) | Indicator Source (PPEET I=interviews C=consensus) |
|-----------------------------------------------------------------------------------------------------------|-----------------------------------------------------------------------|------------------------------------------------------------------------------------|-------------------------------------------------------------------------|---------------------------------------------------|
| 1. <i>Enough Information about the role</i>                                                               | 8 (7-9)                                                               | Keep                                                                               | N/A                                                                     | PPEET, I                                          |
| 2. <i>Clear understanding of the purpose of the SCN that I am a part of</i>                               | 7 (6-9)                                                               | Keep, with edits                                                                   | Keep (90%)                                                              | PPEET, C                                          |
| 3. <i>Able to express views freely</i>                                                                    | 8 (8-9)                                                               | Keep                                                                               | N/A                                                                     | PPEET, I                                          |
| <b>Supports for Engagement Indicators (n=2)</b>                                                           |                                                                       |                                                                                    |                                                                         |                                                   |
| 4. <i>PFAs have supports available for engagement (e.g. technology, travel)</i>                           | 8 (7-9)                                                               | Keep, with edits                                                                   | Keep (80%)                                                              | PPEET, I, C                                       |
| 5. <i>AHS Resources for Patient Engagement are useful for partnering with patient and family advisors</i> | No rating (not developed yet)                                         | Newly developed derived from previous "Resources for Patient Engagement Indicator" | Keep (80%)                                                              | C                                                 |
| 6. <i>Involvement of PFAs make a difference in the work of SCNs (answered by PFAs)</i>                    | 9 (8-9)                                                               | Keep                                                                               | N/A                                                                     | PPEET, I                                          |
| 7. <i>Involvement of PFAs make a difference in the work of SCNs (answered by SCN staff)</i>               | 9 (8-9)                                                               | Keep                                                                               | N/A                                                                     | PPEET, I                                          |
| 8. <i>SCNs take the feedback provided by PFAs into consideration (answered by PFAs)</i>                   | 8 (7-9)                                                               | Keep                                                                               | N/A                                                                     | PPEET, I                                          |
| 9. <i>SCNs take the feedback provided by PFAs into consideration (answered by SCN staff)</i>              | 8 (7-9)                                                               | Keep                                                                               | N/A                                                                     | PPEET, I                                          |
| 10. <i>Individuals engaging in SCN teams represent a broad</i>                                            | 8.5 (7.25-9)                                                          | Keep                                                                               | N/A                                                                     | PPEET, I                                          |

Co-developing engagement indicators – *BMJ Open* submission.1  
2  
3  
4  
5  
6  
7  
8  
9  
10  
11  
12  
13  
14  
15  
16  
17  
18  
19  
20  
21  
22  
23  
24  
25  
26  
27  
28  
29  
30  
31  
32  
33  
34  
35  
36  
37  
38  
39  
40  
41  
42  
43  
44  
45  
46  
47  
48  
49  
50  
51  
52  
53  
54  
55  
56  
57  
58  
59  
60

|                                                                                                                                                                                                       |                               |                                                                    |            |          |
|-------------------------------------------------------------------------------------------------------------------------------------------------------------------------------------------------------|-------------------------------|--------------------------------------------------------------------|------------|----------|
| <b>range of perspectives (answered by PFAs)</b>                                                                                                                                                       |                               |                                                                    |            |          |
| <b>11. Individuals engaging in SCN teams represent a broad range of perspectives (answered by SCN staff)</b>                                                                                          | 8.5 (7.25-9)                  | Keep                                                               | N/A        | PPEET, I |
| <b>12. Individuals engaging in SCN teams perceive the engagement as respectful and sincere to working together (answered by PFAs)</b>                                                                 | 9 (8-9)                       | Keep                                                               | N/A        | I        |
| <b>13. Individuals engaging in SCN teams perceive the engagement as respectful and sincere to working together (answered by SCN staff)</b>                                                            | 9 (8-9)                       | Keep                                                               | N/A        | I        |
| <b>14. PFAs work together with SCN staff to design SCN projects (e.g. in priority setting &amp; planning, development of proposals) (answered by PFAs)</b>                                            | No rating (not developed yet) | Newly developed derived from previous “Working Together Indicator” | Keep (95%) | C        |
| <b>15. SCN staff work together with PFAs to design SCN projects (e.g. in priority setting &amp; planning, development of proposals) (answered by SCN staff)</b>                                       | No rating (not developed yet) | Newly developed derived from previous “Working Together Indicator  | Keep (95%) | C        |
| <b>16. PFAs work together with SCN staff to conduct SCN projects (e.g. collaborate in data collection, analysis/interpretation, advising on project as it is carried out) (answered by PFAs)</b>      | No rating (not developed yet) | Newly developed derived from previous “Working Together Indicator  | Keep (79%) | C        |
| <b>17. SCN staff work together with PFAs to conduct SCN projects (e.g. collaborate in data collection, analysis/interpretation, advising on project as it is carried out) (answered by SCN staff)</b> | No rating (not developed yet) | Newly developed derived from previous “Working Together Indicator  | Keep (90%) | C        |
| <b>18. PFAs work together with SCN staff to disseminate SCN projects (e.g. co-presenting at conferences, sharing work widely)</b>                                                                     | No rating (not developed yet) | Newly developed derived from previous “Working                     | Keep (75%) | C        |

|  | Together<br>Indicator |
|--|-----------------------|
|--|-----------------------|

519 \*N/A= voting not required/applicable as PFE-I accepted in previous round

520

521 **Discussion**

522

523 Working in partnership with the AHS SCN teams, their advisors in the Patient Engagement Reference  
524 Group, and the Albertans4HealthResearch Collaborative Council, we co-developed patient and family  
525 engagement indicators to measure engagement in health system transformation. Through an initial  
526 synthesis of the evidence and a consensus approach using the PFE-Is we were able to develop 18  
527 indicators that reflect meaningful patient engagement. The findings align with the core principles  
528 highlighted in the CIHR SPOR Patient Engagement framework: Inclusiveness, Support, Mutual Respect,  
529 and Co-Build.(12)

530

531 The final 18 evidence-based and patient, family and stakeholder informed indicators are ready to be  
532 used to measure and evaluate meaningful engagement in health system transformation. The use of  
533 these indicators promotes the changes needed to improve the quality of health research and health  
534 system improvement that is informed by patients and families. The use of the indicators within the  
535 healthcare system to learn from and evaluate health policy and practice related to what matters to  
536 patients and families is a critical next step.

537

538 The strength of this study is the participatory approach used to develop PFE-Is, which ensures that  
539 engagement was evaluated from the perspective of those who provide and receive care. We aimed to  
540 adhere to the guiding CIHR principles for patient engagement. Our process was inclusive- we engaged  
541 patient and family advisors from different SCNs who bring diverse healthcare experiences and  
542 conditions. Supports- financial compensation was provided to the patient partners in our team, and  
543 flexibility given to patient and family advisors engaged in the consensus process (survey to rate  
544 indicators could be completed at own pace, feedback encouraged over zoom using chat features and  
545 during meeting). Mutual respect- acknowledging and valuing expertise and experiential knowledge of all  
546 members of the research team and members of the consensus. Co-build- working with our patient  
547 partners to design, review, conduct, and disseminate the findings of the project. To our knowledge, this  
548 is the first study to develop a set of PFE-Is using a rigorous evidence-based and person-centred approach  
549 and involving patients and caregivers throughout the research process—from inception of the project to  
550 manuscript development including dissemination activities.

551

552 Using a highly participatory approach, we sought to ensure that the study was guided by the perspective  
553 of individuals with lived experiences, and that diverse perspectives were reflected in the development of  
554 the PFE-Is. Consensus methods have been utilized in patient and family engagement research with  
555 patient and family advisors. For instance, the study by Anderson et al.(23) identified 32  
556 recommendations for optimizing patient engagement in hospital planning and improvement. Their  
557 recommendations align with the findings identified from our interviews with SCN members, such as  
558 inclusive recruitment strategies, providing patient and family advisors supports for engagement, and  
559 respectful engagement.

560

561 While measures of engagement were identified in Boivin et al. review,(15) these were not considered  
562 indicators as per the definition of indicators suggested by the Agency for Healthcare Research and  
563 Quality - as units of measurement, such as percentage or proportion.(24) The measure, PPEET,(17) was



564 identified by patients, caregivers and other individuals from diverse communities in Alberta as the  
565 measure to use given it was relevant and addressed important domains measuring patient engagement.

566  
567 These newly developed indicators present an opportunity to improve meaningful engagement ensuring  
568 that the voices of the individuals with lived experiences are incorporated into health systems supporting  
569 the transformation of healthcare. To drive changes in healthcare policy and practice, there is a need to  
570 develop and implement standardized ongoing mechanisms to measure and evaluate healthcare  
571 incorporating the patients' perspectives. In doing so, the effectiveness of engagement practices can be  
572 strengthened and advanced across the system.

573  
574 The findings from the survey and interviews reflected priorities that focused on the process of patient  
575 engagement as they were from the perspectives of patient and family advisors and SCN staff members  
576 working together within the SCNs. Impact of patient engagement on patient and family advisors and  
577 SCN staff members on themselves are captured in some of the PFE-Is. However, indicators assessing  
578 impact of patient engagement on the organization were not developed (such as changes in policies,  
579 procedures, and resources), which may be a limitation of this work. Similarly, the review by Boivin et  
580 al.(15) and Dukhanin et al.(25) found most evaluation tools assessing context and process of evaluation.  
581 Dukhanin et al.(25) notes that measuring outcomes of engagement is needed, such as documented  
582 changes in policies, procedures, or programs, however current measures do not sufficiently capture  
583 these aspects. Another limitation of this project is that these set of indicators have not been evaluated.  
584 However, a future direction of this work is to evaluate and implement the indicators within the current  
585 healthcare system. We have started consultations with AHS SCNs stakeholders to assess the feasibility of  
586 data collection processes. Only by attempting real-world data collection can we determine whether the  
587 indicators meet the traditional standards of 'good-quality measures', to be acceptable, reliable and  
588 valid.(26) Moreover, studying the implementation of the PFE-Is could shed light into their effectiveness  
589 for promoting improvements in patient engagement across the SCNs for specific projects (health  
590 research and quality improvement). It is also important to identify any unintended consequences as a  
591 result of the implementation of these PFE-Is, of their use for benchmarking and other issues that may  
592 arise, such as implications on staff workload and their cost-effectiveness.

593  
594 Additionally, while this method has generated these 18 PFE-Is using a validated consensus method, they  
595 may not necessarily be universally applicable in all settings and countries due to differing healthcare  
596 systems. Different cultural settings in different healthcare regulatory environments may mean that  
597 different measures may be more appropriate for certain settings. Further work can be done to tailor and  
598 adapt these PFE-Is, recognizing that a consideration of the local context will ensure a more universal  
599 relevance. Future steps for this work include the evaluation of implementing these indicators within the  
600 SCNs.

601  
602 **Author Contributions:** MS and TW conceived and designed the study. TM, GW, SZ, SA conducted data  
603 collection. SA and MS worked on the analysis and interpretation of findings, with feedback from TW, PF,  
604 GW, SZ, MM, JP, TM. MS, SA, PF drafted the article, and all authors (TW, GW, SZ, PF, MM, JP) provided  
605 critical feedback and approved the manuscript to be published.

606  
607 **Funding:** This work was supported by Canadian Institutes of Health Research (CIHR) Strategy for Patient-  
608 Oriented Research (SPOR) (Grant Number: N/A).

609  
610 **Ethics Approval:** The University of Calgary Conjoint Health Research Ethics Board (CHREB) has approved  
611 this project (REB20-1822).

612

613 **Competing Interests:** None declared.

614

615 **Patient consent for publication:** Not applicable.

616

617 **Data Sharing:** This study analyzes qualitative data and the participants did not consent to have their full  
618 transcripts made publicly available. Other additional data available upon reasonable request.

619

620 **Acknowledgments:** Ana Flechas and Dr. Sumedh Bele for their support in phase 2 of data collection. We  
621 would also like to acknowledge our Albertans4Health Research Collaborative Council, the Alberta Health  
622 Services Strategic Clinical Networks, and patient and family advisors for their participation.

623

624 Figure 1. An overview of the program of research on the development of patient and family engagement  
625 indicators

626

627 Figure 2. Overview of themes and sub-themes identified from interviews with PFAs and SCN staff

628

629 Figure 3. A flow chart of the PFE-Indicators Modified Delphi Process

630

631

632

## 633 *References*

634

635 1. Santana M-J, Manalili K, Zelinsky S, Brien S, Gibbons E, King J, et al. Improving the quality  
636 of person-centred healthcare from the patient perspective: development of person-centred  
637 quality indicators. *BMJ open*. 2020;10(10):e037323.

638 2. Bombard Y, Baker G, Orlando E, Fancott C, Bhatia P, Casalino S. & Pomey, MP (2018).  
639 Engaging patients to improve quality of care: a systematic review. *Implementation  
640 Science*.13(1):98.

641 3. Veitch D, editor *One province, one healthcare system: a decade of healthcare  
642 transformation in Alberta*. Healthcare management forum; 2018: Sage Publications Sage CA:  
643 Los Angeles, CA.

644 4. Wasylak T, Strilchuk A, Manns B. Strategic clinical networks: from pilot to practice  
645 change to planning for the future. *CMAJ*. 2019;191(Suppl):S54-S6.

646 5. Yiu V, Belanger F, Todd K. Alberta's strategic clinical networks: enabling health system  
647 innovation and improvement. *CMAJ*. 2019;191(Suppl):S1-S3.

648 6. Mork M, Laxdal G, Wilkinson G. Patient and family engagement in Alberta's Strategic  
649 Clinical Networks. *CMAJ*. 2019;191(Suppl):S4-S6.

650 7. Manns BJ, Strilchuk A, Mork M, Wasylak T, editors. *Alberta's Strategic Clinical Networks:  
651 a roadmap for the future*. Healthcare Management Forum; 2019: SAGE Publications Sage CA:  
652 Los Angeles, CA.

653 8. McCarron TL, Moffat K, Wilkinson G, Zelinsky S, Boyd JM, White D, et al. Understanding  
654 patient engagement in health system decision-making: a co-designed scoping review.  
655 *Systematic reviews*. 2019;8(1):1-10.

- 655 9. McCarron TL, Noseworthy T, Moffat K, Wilkinson G, Zelinsky S, White D, et al. A  
656 co-designed framework to support and sustain patient and family engagement in health-care  
657 decision making. *Health Expectations*. 2020.
- 658 10. Alberta SPOR SUPPORT Unit. Patient Engagement 2022 [cited 2022 July 14]. Available  
659 from: <https://absporu.ca/patient-engagement/>.
- 660 11. Fitch K, Bernstein SJ, Aguilar MD, Burnand B, LaCalle JR. The RAND/UCLA  
661 appropriateness method user's manual. Rand Corp Santa Monica CA; 2001.
- 662 12. Canadian Institute for Health Research. Canadian Strategy for Patient-Oriented Research  
663 (SPOR) 2014 [cited 2022 July 14]. Available from: <http://www.cihr-irsc.gc.ca/e/41204.html>.
- 664 13. Alberta SPOR SUPPORT Unit. PaCER- Patient and Community Engagement Research  
665 2022 [cited 2022 July 14]. Available from: <https://absporu.ca/patient-engagement/pacer/>.
- 666 14. IMAGINE SPOR. IMAGINE Patient Research Partners 2022 [cited 2022 July 14]. Available  
667 from: <https://absporu.ca/patient-engagement/pacer/>.
- 668 15. Boivin A, L'Espérance A, Gauvin FP, Dumez V, Macaulay AC, Lehoux P, et al. Patient and  
669 public engagement in research and health system decision making: a systematic review of  
670 evaluation tools. *Health Expectations*. 2018;21(6):1075-84.
- 671 16. Hamilton CB, Hoens AM, McQuitty S, McKinnon AM, English K, Backman CL, et al.  
672 Development and pre-testing of the Patient Engagement In Research Scale (PEIRS) to assess the  
673 quality of engagement from a patient perspective. *PloS one*. 2018;13(11):e0206588.
- 674 17. Abelson J, Li K, Wilson G, Shields K, Schneider C, Boesveld S. Supporting quality public  
675 and patient engagement in health system organizations: development and usability testing of  
676 the P ublic and P atient E ngagement E valuation T ool. *Health Expectations*. 2016;19(4):817-27.
- 677 18. Patient-Centered Outcomes Research Institute. Ways of Engaging-ENGagement ACTivity  
678 Tool (WE-ENACT) – patients and stakeholders 3.0 item pool. 2016 [cited 2022 July 14]. Available  
679 from: [https://www.pcori.org/sites/default/files/PCORI-WE-ENACT-3-0-Patients-Stakeholders-  
680 Item-Pool-080916.pdf](https://www.pcori.org/sites/default/files/PCORI-WE-ENACT-3-0-Patients-Stakeholders-Item-Pool-080916.pdf).
- 681 19. Qualtrics. Online Survey Software 2021 [cited 2022 July 14]. Available from:  
682 <https://www.qualtrics.com/core-xm/survey-software/>.
- 683 20. Sandelowski M. What's in a name? Qualitative description revisited. *Research in nursing  
684 & health*. 2010;33(1):77-84.
- 685 21. Braun V, Clarke V. Using thematic analysis in psychology. *Qualitative research in  
686 psychology*. 2006;3(2):77-101.
- 687 22. Jones J, Hunter D. Consensus methods for medical and health services research. *BMJ:  
688 British Medical Journal*. 1995;311(7001):376.
- 689 23. Anderson NN, Baker GR, Moody L, Scane K, Urquhart R, Wodchis WP, et al. Consensus  
690 on how to optimise patient/family engagement in hospital planning and improvement: a Delphi  
691 survey. *BMJ open*. 2022;12(9):e061271.
- 692 24. Agency for Healthcare Research and Quality (AHRQ). AHRQ Quality Indicator Tools for  
693 Data Analytics  
694  
695 2022 [cited 2022 July 14]. Available from:  
696 <https://www.ahrq.gov/data/qualityindicators/index.html>.

Co-developing engagement indicators – *BMJ Open* submission.

- 1  
2  
3 697 25. Dukhanin V, Topazian R, DeCamp M. Metrics and evaluation tools for patient  
4 698 engagement in healthcare organization-and system-level decision-making: a systematic review.  
5 699 International journal of health policy and management. 2018;7(10):889.  
6 700 26. Grol R, Wensing M, Eccles M, Davis D. Improving patient care: the implementation of  
7 701 change in health care: John Wiley & Sons; 2013.  
8 702  
9  
10  
11  
12  
13  
14  
15  
16  
17  
18  
19  
20  
21  
22  
23  
24  
25  
26  
27  
28  
29  
30  
31  
32  
33  
34  
35  
36  
37  
38  
39  
40  
41  
42  
43  
44  
45  
46  
47  
48  
49  
50  
51  
52  
53  
54  
55  
56  
57  
58  
59  
60

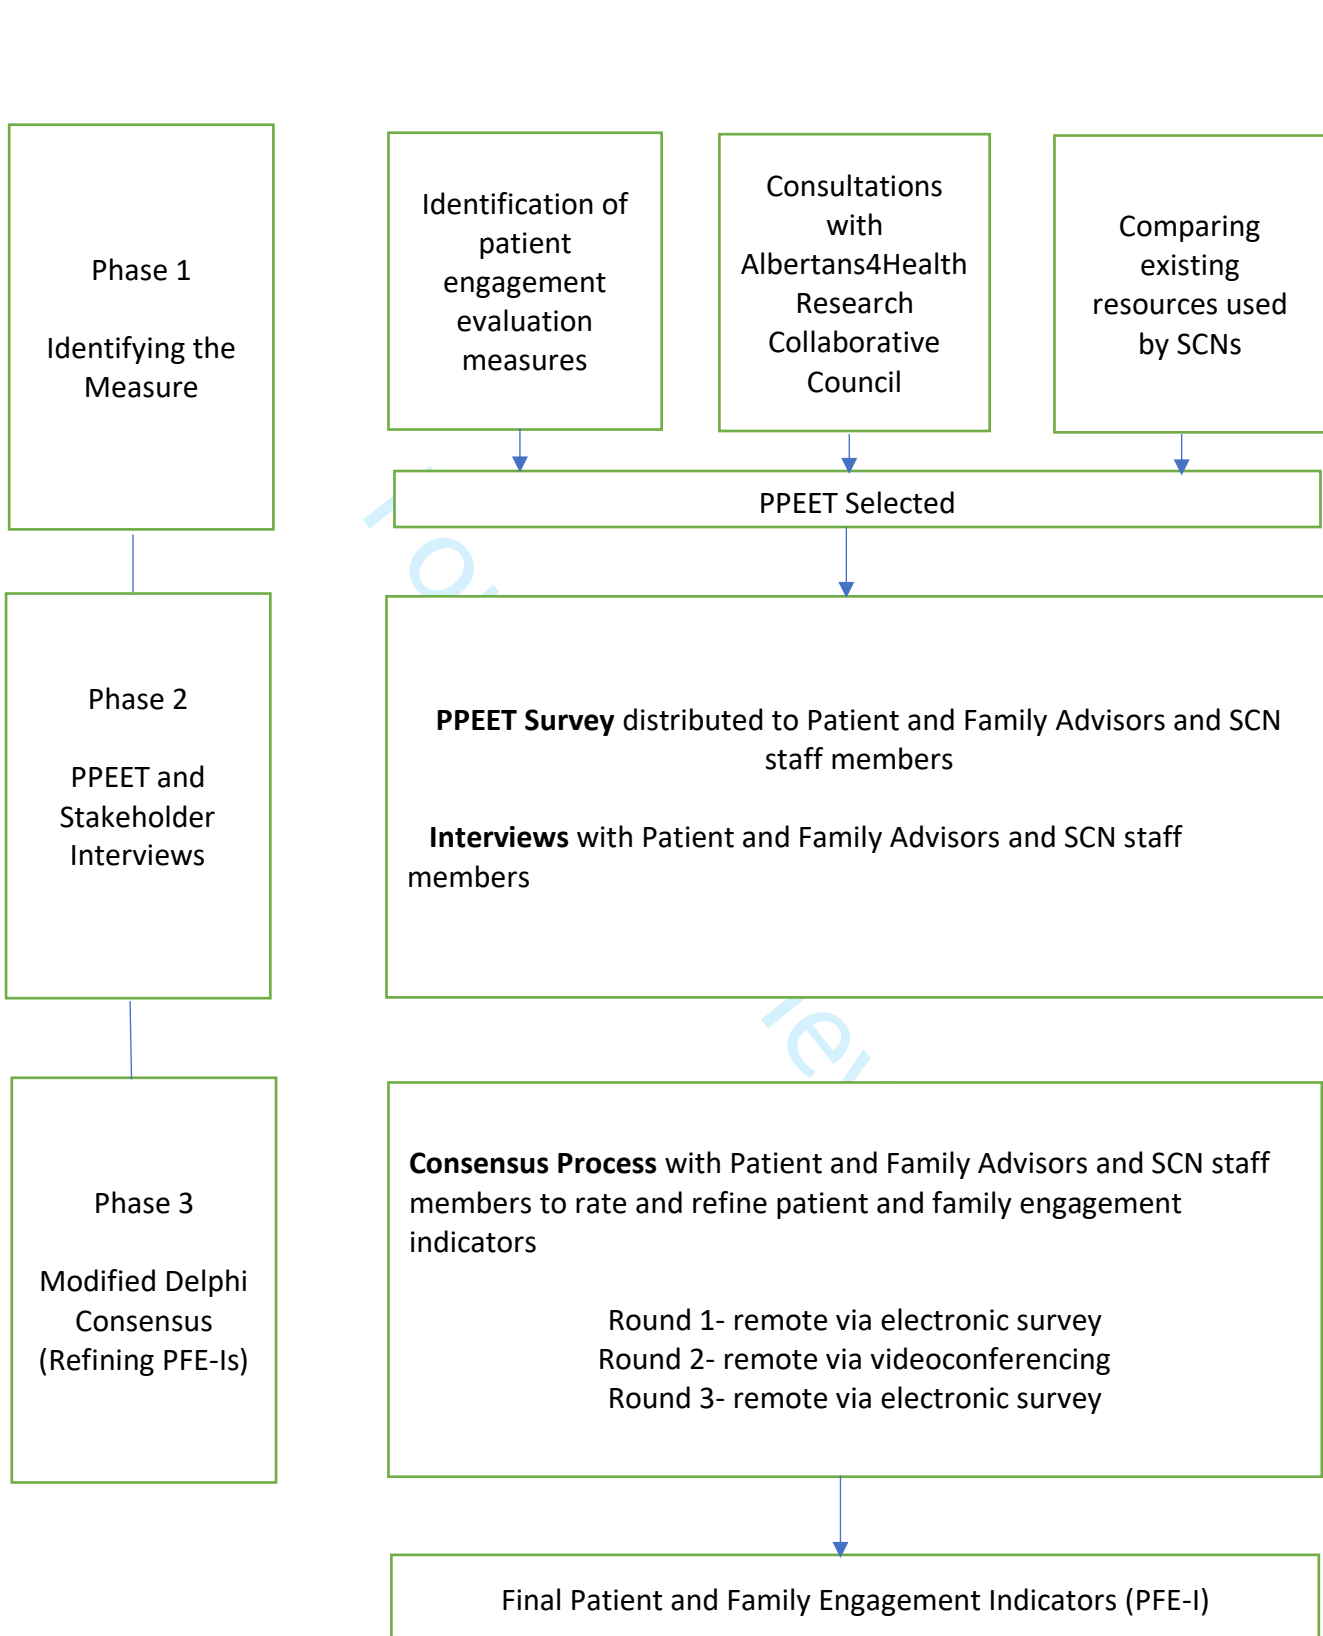

Figure 1. An overview of the program of research on the development of patient and family engagement indicators

Figure 2. Overview of themes and sub-themes identified from interviews with PFAs and SCN staff

|                                                                                                                                      |                                                                                                                                                                                                                                                                      |                                                                                                                                                        |                                                                                                                                                                           |                                                                                                                                                                                            |
|--------------------------------------------------------------------------------------------------------------------------------------|----------------------------------------------------------------------------------------------------------------------------------------------------------------------------------------------------------------------------------------------------------------------|--------------------------------------------------------------------------------------------------------------------------------------------------------|---------------------------------------------------------------------------------------------------------------------------------------------------------------------------|--------------------------------------------------------------------------------------------------------------------------------------------------------------------------------------------|
| Themes                                                                                                                               | <b>1. Improving Patient Engagement within the SCNs</b>                                                                                                                                                                                                               |                                                                                                                                                        |                                                                                                                                                                           |                                                                                                                                                                                            |
|                                                                                                                                      | <b>Inclusive recruitment strategies</b>                                                                                                                                                                                                                              | <b>Supports for PE</b>                                                                                                                                 | <b>Respectful Engagement</b>                                                                                                                                              | <b>Involvement in decision making</b>                                                                                                                                                      |
|                                                                                                                                      | "the only thing I could suggest is really like having a stipend available for those who need it... It may encourage more diversity" (Staff1)                                                                                                                         | "I basically mentor them; I reach out for any opportunities, whether it's for further project work or for telling their story at co-meetings" (Staff4) | "the ones [that] are tokenism, and that decisions had already been made and they were just looking to tick a box on a form to say "yes, we had patient engagement" (PFA7) | "push the envelope more in terms of our involvement of our patient advisors as leaders within the SCN... I think some people are ready to do that, especially the PACER grads." (SCNLead7) |
|                                                                                                                                      | <b>2. Communication with PFAs</b>                                                                                                                                                                                                                                    |                                                                                                                                                        |                                                                                                                                                                           |                                                                                                                                                                                            |
| <b>Communication Strategies</b>                                                                                                      | <b>Role clarity &amp; Expectations</b>                                                                                                                                                                                                                               |                                                                                                                                                        |                                                                                                                                                                           |                                                                                                                                                                                            |
| "staff would call us to talk about the agenda... review the agenda...so we were really kept informed as to what was going on" (PFA6) | "...there has to be a real discussion about what is their role?...Because you want to have the role fit with what the patient's expectations are as well and... not every patient is maybe going to want to be as involved." (SCNLead6)                              |                                                                                                                                                        |                                                                                                                                                                           |                                                                                                                                                                                            |
| Subthemes                                                                                                                            | <b>3. Work Environment</b>                                                                                                                                                                                                                                           |                                                                                                                                                        |                                                                                                                                                                           |                                                                                                                                                                                            |
|                                                                                                                                      | <b>Adapting to virtual environment due to COVID</b>                                                                                                                                                                                                                  | <b>Comfort to Contribute</b>                                                                                                                           |                                                                                                                                                                           |                                                                                                                                                                                            |
|                                                                                                                                      | "when COVID hit, our staff liaison started meeting with us and it was every two weeks we got together for an hour or an hour and a half on zoom, catch up on the news, find out what's going on...they really connected us in a very personal and strong way" (PFA4) |                                                                                                                                                        |                                                                                                                                                                           |                                                                                                                                                                                            |
|                                                                                                                                      | <b>4. Motivations to sustain engagement</b>                                                                                                                                                                                                                          |                                                                                                                                                        |                                                                                                                                                                           |                                                                                                                                                                                            |
| <b>Relationship-building</b>                                                                                                         | <b>Learning Opportunities</b>                                                                                                                                                                                                                                        | <b>Feeling valued</b>                                                                                                                                  | <b>Impact on healthcare</b>                                                                                                                                               |                                                                                                                                                                                            |
| "I've also benefited from the relationships I've formed with people and from the respect I've gotten from that..." (PFA8)            | "I'm learning more about research, I'm learning more about kidney function, but I'm learning more about people...really valuable." (PFA4)                                                                                                                            | it is satisfying to know that your voice is appreciated...why I was involved." (PFA8)                                                                  | "one of the hardest things for me was you just don't see anything get across the finish line so you wonder if your time is even worth anything right after that" (PFA1)   |                                                                                                                                                                                            |

view only

Figure 3. A flow chart of the PFE-Indicators Modified Delphi Process

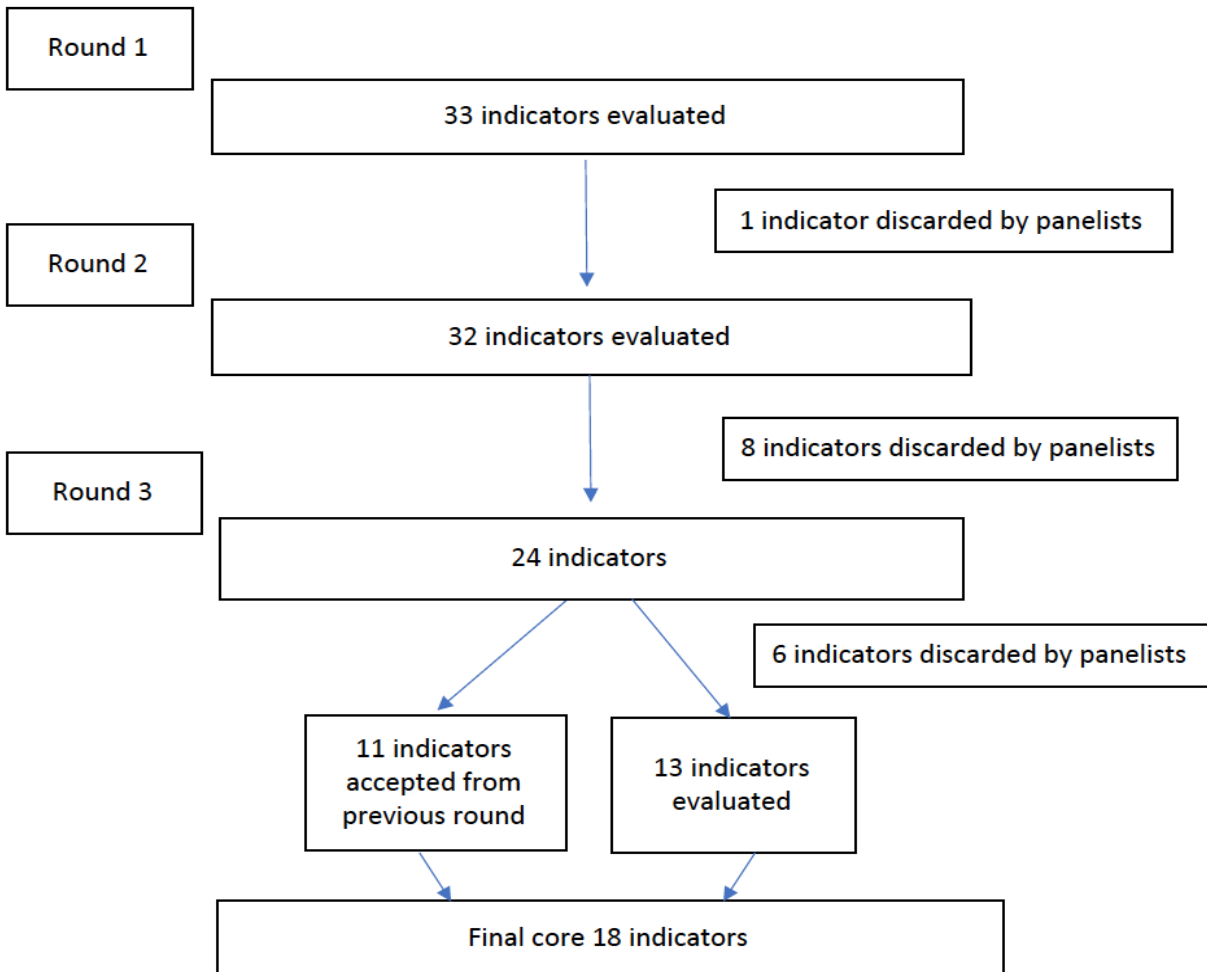

view only

## Evaluation of Patient Engagement in the SCNs: Interview Guide

### Interview Guide

1. How long have you been or were you involved with the SCNs?
2. Why did you decide to get involved in the SCNs?
3. How well was information about the patient and family advisor role communicated to you when you began your involvement with the SCNs? (*Was the purpose of patient/family engagement clear? Did you understand your role?*)
4. Can you describe how you have been involved?  
**Probes:** *What was your role? How have you contributed?*
5. On a scale of 1-10, with 1 being not good at all, and 10 being excellent, how would you rate the way the SCN team (clinicians, researchers, patient partners) works(ed) together?  
**Probes:** *Please comment on the way the research team worked together (clinicians, researchers, patient advisors)*  
*How were expectations/instructions communicated?*  
*How comfortable were you in contributing?*
6. Would you change anything regarding your involvement with the SCNs? (*e.g. time commitment, expectations, deadlines etc.*) / (**if project has ended**): If you could do it again, what would you change?
7. Sometimes there are challenges when researchers, patients, and other stakeholders work together. Have you encountered any challenges with your involvement in the SCNs?
8. Thinking about your contributions so far, what impact do you think you have had on SCN work?  
(considering both short- & long-term impacts, outputs of this work)  
**Probes:** *Impact of your involvement to this specific research project? To health research in general?*
9. How have you benefitted from your involvement?
10. When thinking about your involvement, why do you continue to do what you do?



1  
2  
3 11. What do you need to strengthen your involvement?  
4

5 12. What has been your experience working with teams virtually?  
6

7 **Probes:** *Did you feel like you could contribute, ask questions, raise concerns?*  
8

9 13. Based on your experience, do you have any suggestions for improvements that SCN  
10 teams could make when working with patient and family advisors?  
11  
12

13 14. Do you have any other comments/observations about your experience?  
14  
15  
16  
17  
18  
19  
20  
21  
22  
23  
24  
25  
26  
27  
28  
29  
30  
31  
32  
33  
34  
35  
36  
37  
38  
39  
40  
41  
42  
43  
44  
45  
46  
47  
48  
49  
50  
51  
52  
53  
54  
55  
56  
57  
58  
59  
60

1  
2  
3  
4  
5  
6  
7  
8  
9  
10  
11  
12  
13  
14  
15  
16  
17  
18  
19  
20  
21  
22  
23  
24  
25  
26  
27  
28  
29  
30  
31  
32  
33  
34  
35  
36  
37  
38  
39  
40  
41  
42  
43  
44  
45  
46  
47  
48  
49  
50  
51  
52  
53  
54  
55  
56  
57  
58  
59  
60

## APPENDIX II- Patient and Family Engagement Indicators

| Indicator Name                                                                                                | Numerator                                                                                                                                                                                       | Denominator                                           |
|---------------------------------------------------------------------------------------------------------------|-------------------------------------------------------------------------------------------------------------------------------------------------------------------------------------------------|-------------------------------------------------------|
| 1. Enough information about the role                                                                          | Number of PFAs who responded agree or strongly agree to having enough information about their role                                                                                              | Total number of PFAs responding to this question      |
| 2. Clear understanding of the purpose of the SCN that I am a part of                                          | Number of PFAs who responded agree or strongly agree to having a clear understanding of the purpose of the SCN they are a part of                                                               | Total number of PFAs responding to this question      |
| 3. Able to express views freely                                                                               | Number of PFAs who responded agree or strongly agree to being able to express their views freely                                                                                                | Total number of PFAs responding to this question      |
| 4. PFAs have supports available for engagement                                                                | Number of PFAs who responded agree or strongly agree to having supports (i.e. technology, travel) available for engagement                                                                      | Total number of PFAs responding to this question      |
| 5. AHS Resources for Patient Engagement are useful for partnering with patient and family advisors (for PFAs) | Number of PFAs who responded agree or strongly agree that AHS resources* for partnering with patient and family advisors are useful<br>* AHS Guidebook for engaging patient and family advisors | Total number of PFAs responding to this question      |
| 6. Involvement of PFAs make a difference in the work of SCNs (answered by PFAs)                               | Number of PFAs who responded agree or strongly agree to the statement that involvement of PFAs make a difference in the work of SCNs                                                            | Total number of PFAs responding to this question      |
| 7. Involvement of PFAs make a difference in the work of SCNs (answered by SCN staff)                          | Number of SCN staff who responded agree or strongly agree to the statement that involvement of PFAs make a difference in the work of SCNs                                                       | Total number of SCN staff responding to this question |
| 8. SCNs take the feedback provided by PFAs into consideration (answered by PFAs)                              | Number of PFAs who responded agree or strongly agree to the statement that SCNs take the feedback provided by PFAs into consideration                                                           | Total number of PFAs responding to this question      |
| 9. SCNs take the feedback provided by PFAs into consideration (answered by SCN staff)                         | Number of SCN staff who responded agree or strongly agree to the statement that SCNs take the feedback provided by PFAs into consideration                                                      | Total number of SCN staff responding to this question |
| 10. Individuals engaging in SCN teams represent a                                                             | Number of PFAs who responded agree or strongly agree that individuals engaging in the                                                                                                           | Total number of PFAs responding to this question      |

|                                                                                                                                     |                                                                                                                                                                                                                              |                                                       |
|-------------------------------------------------------------------------------------------------------------------------------------|------------------------------------------------------------------------------------------------------------------------------------------------------------------------------------------------------------------------------|-------------------------------------------------------|
| broad range of perspectives (answered by PFAs)                                                                                      | SCN teams represent a broad range of perspectives                                                                                                                                                                            |                                                       |
| 11. Individuals engaging in SCN teams represent a broad range of perspectives (answered by SCN staff)                               | Number of SCN staff who responded agree or strongly agree that individuals engaging in the SCN teams represent a broad range of perspectives                                                                                 | Total number of SCN staff responding to this question |
| 12. Individuals engaging in SCN teams perceive the engagement as respectful and sincere to working together (answered by PFAs)      | Number of PFAs who responded agree or strongly agree that the engagement was respectful and sincere to working together                                                                                                      | Total number of PFAs responding to this question      |
| 13. Individuals engaging in SCN teams perceive the engagement as respectful and sincere to working together (answered by SCN Staff) | Number of SCN staff who responded agree or strongly agree that the engagement was respectful and sincere to working together                                                                                                 | Total number of SCN staff responding to this question |
| 14. PFAs work together with SCN staff to design SCN projects                                                                        | Number of PFAs who responded agree or strongly agree that they work together with SCN staff to design SCN projects (e.g. in priority setting & planning, development of proposals)                                           | Total number of PFAs responding to this question      |
| 15. SCN staff work together with PFAs to design SCN projects                                                                        | Number of SCN staff who responded agree or strongly agree that they work together with PFAs to design SCN projects (e.g. in priority setting & planning, development of proposals)                                           | Total number of SCN staff responding to this question |
| 16. PFAs work together with SCN staff to conduct SCN projects                                                                       | Number of PFAs who responded agree or strongly agree that they work together with SCN staff to conduct SCN projects (e.g. collaborate in data collection, analysis/interpretation, advising on project as it is carried out) | Total number of PFAs responding to this question      |
| 17. SCN staff work together with PFAs to conduct SCN projects                                                                       | Number of SCN staff who responded agree or strongly agree that they work together with PFAs to conduct SCN projects (e.g.                                                                                                    | Total number of SCN staff responding to this question |

1  
2  
3  
4  
5  
6  
7  
8  
9  
10  
11  
12  
13  
14  
15  
16  
17  
18  
19  
20  
21  
22  
23  
24  
25  
26  
27  
28  
29  
30  
31  
32  
33  
34  
35  
36  
37  
38  
39  
40  
41  
42  
43  
44  
45  
46  
47  
48  
49  
50  
51  
52  
53  
54  
55  
56  
57  
58  
59  
60

|                                                                   |                                                                                                                                                                                  |                                                  |
|-------------------------------------------------------------------|----------------------------------------------------------------------------------------------------------------------------------------------------------------------------------|--------------------------------------------------|
|                                                                   | collaborate in data collection, analysis/interpretation, advising on project as it is carried out)                                                                               |                                                  |
| 18. PFAs work together with SCN staff to disseminate SCN projects | Number of PFAs who responded agree or strongly agree that they work together with SCN staff to disseminate SCN projects (e.g. co-presenting at conferences, sharing work widely) | Total number of PFAs responding to this question |

**Discarded Indicators from Round 2**

| <b>Indicator</b>                                                                                                       | <b>Comments from panelists</b>                                                                                                                                 |
|------------------------------------------------------------------------------------------------------------------------|----------------------------------------------------------------------------------------------------------------------------------------------------------------|
| 1. PFAs being meaningfully engaged virtually                                                                           | Different concepts – meaningful engagement & virtual, difficult to measure & action<br>Group suggestion: incorporate this indicator into others already listed |
| 2. PFAs have a supportive working environment to contribute to the engagement initiative                               | Repetitive indicator, and confusion regarding how supportive working environment is defined                                                                    |
| 3. SCNs have mentorship opportunities for PFAs                                                                         | Confusion regarding who the mentor would be, could be incorporated in another indicator                                                                        |
| 4. Each SCN has an explicit strategy or framework for patient engagement                                               | Seems more like a policy than an indicator<br>doesn't need to be an indicator that is surveying staff                                                          |
| 5. Each SCN is at the stage of established/making some progress in engagement with patient and family advisors         | Wording is confusing and hard to understand                                                                                                                    |
| 6. Each SCN has explicit strategies for recruiting patient and family advisors, depending on the engagement initiative | More policy related, and not informing what needs to be improved                                                                                               |
| 7. There are resources (documents, guidelines) available to SCN Staff for PFA engagement                               | Redundant                                                                                                                                                      |
| 8. Each SCN prepares reports that summarize the contributions from patient and family advisor engagement initiatives   | Discarded in round 1 (Median rating on overall importance was 5)                                                                                               |
| 9. The SCN is achieving its stated objectives                                                                          | Too broad and difficult to measure<br>Would need to clarify what the objectives are                                                                            |

**Table 1**

Consolidated criteria for reporting qualitative studies (COREQ): 32-item checklist

For peer review only

1 **Domain 1:**  
2 **Research team**  
3 **and reflexivity**

4  
5  
6 **Personal**  
7 **Characteristics**

- |    |    |                                                        |                                               |
|----|----|--------------------------------------------------------|-----------------------------------------------|
| 8  |    |                                                        |                                               |
| 9  |    |                                                        |                                               |
| 10 | 1. | <b>Interviewer/facilitator</b>                         | <b>Which author/s conducted the</b>           |
| 11 |    |                                                        | <b>interview or focus group? (pg.6)</b>       |
| 12 |    |                                                        | members of the research team (SZ, GW, SA, TM) |
| 13 |    |                                                        |                                               |
| 14 | 2. | <b>Credentials</b>                                     | <b>What were the researcher's</b>             |
| 15 |    | qualitative research background, SA (MSc) and TM (PhD) | <b>credentials? E.g. PhD, MD (pg.6)</b>       |
| 16 |    | training, 2 other members were patient partners with   |                                               |
| 17 |    | PaCER training (SZ, GW)                                |                                               |
| 18 | 3. | <b>Occupation</b>                                      | <b>What was their occupation at the</b>       |
| 19 |    | researchers and patient partners                       | <b>time of the study? (pg.6)</b>              |
| 20 |    |                                                        |                                               |
| 21 | 4. | <b>Gender</b>                                          | <b>Was the researcher male or</b>             |
| 22 |    | female                                                 | <b>female? (pg.6)</b>                         |
| 23 |    |                                                        |                                               |
| 24 |    |                                                        |                                               |
| 25 | 5. | <b>Experience and training</b>                         | <b>What experience or training did</b>        |
| 26 |    |                                                        | <b>the researcher have? (pg.6)</b>            |
| 27 |    |                                                        |                                               |
| 28 |    |                                                        |                                               |

29 **Relationship**  
30 **with**  
31 **participants**

32 Recruitment was supported by members of the research team  
33 (GW, MM, JP, and TW), working with and leading the AHS SCNs.

- |    |    |                                                 |                                            |
|----|----|-------------------------------------------------|--------------------------------------------|
| 34 | 6. | <b>Relationship established</b>                 | <b>Was a relationship established</b>      |
| 35 |    |                                                 | <b>prior to study commencement?</b>        |
| 36 |    |                                                 | <b>(pg.4)</b>                              |
| 37 |    |                                                 |                                            |
| 38 |    |                                                 |                                            |
| 39 | 7. | <b>Participant knowledge of the interviewer</b> | <b>What did the participants know</b>      |
| 40 |    | Individuals from SCNs were contacted            | <b>about the researcher? e.g.</b>          |
| 41 |    | via email to provide information                | <b>personal goals, reasons for doing</b>   |
| 42 |    | about the study and who would be                | <b>the research (pg.4)</b>                 |
| 43 |    | conducting the interviews                       | <b>and 5</b>                               |
| 44 |    |                                                 |                                            |
| 45 |    |                                                 |                                            |
| 46 | 8. | <b>Interviewer characteristics</b>              | <b>What characteristics were</b>           |
| 47 |    |                                                 | <b>reported about the</b>                  |
| 48 |    |                                                 | <b>interviewer/facilitator? e.g. Bias,</b> |
| 49 |    |                                                 |                                            |
| 50 |    |                                                 |                                            |

researchers and patient partners are working in patient-oriented research teams and engage patient partners as members of the research team.

***assumptions, reasons and interests in the research topic***

## Domain 2: study design

### Theoretical framework

|    |                                                                                                                     |                                                                                                                                                                        |
|----|---------------------------------------------------------------------------------------------------------------------|------------------------------------------------------------------------------------------------------------------------------------------------------------------------|
| 9. | <b>Methodological orientation and Theory</b><br><br>this study is informed by the CIHR Patient Engagement Framework | <b>What methodological orientation was stated to underpin the study? e.g. grounded theory, discourse analysis, ethnography, phenomenology, content analysis (pg.4)</b> |
|----|---------------------------------------------------------------------------------------------------------------------|------------------------------------------------------------------------------------------------------------------------------------------------------------------------|

### Participant selection

|     |                                                                                                            |                                                                                                  |
|-----|------------------------------------------------------------------------------------------------------------|--------------------------------------------------------------------------------------------------|
| 10. | <b>Sampling</b><br><br>purposive- SCN leadership, staff members and patient and family advisors            | <b>How were participants selected? e.g. purposive, convenience, consecutive, snowball (pg.4)</b> |
| 11. | <b>Method of approach</b><br><br>email                                                                     | <b>How were participants approached? e.g. face-to-face, telephone, mail, email (pg.4)</b>        |
| 12. | <b>Sample size</b><br><br>96 participants responded to the survey. Of those, 26 participated in interviews | <b>How many participants were in the study? (pg.9)</b>                                           |
| 13. | <b>Non-participation</b>                                                                                   | <b>How many people refused to participate or dropped out? Reasons? (N/A)</b>                     |

### Setting

|     |                                          |                                                                                |
|-----|------------------------------------------|--------------------------------------------------------------------------------|
| 14. | <b>Setting of data collection</b> online | <b>Where was the data collected? e.g. home, clinic, workplace (pg.4 and 5)</b> |
|-----|------------------------------------------|--------------------------------------------------------------------------------|



|    |                                        |                                                                                                                                                                                                                                     |
|----|----------------------------------------|-------------------------------------------------------------------------------------------------------------------------------------------------------------------------------------------------------------------------------------|
| 1  |                                        |                                                                                                                                                                                                                                     |
| 2  |                                        |                                                                                                                                                                                                                                     |
| 3  |                                        |                                                                                                                                                                                                                                     |
| 4  | <b>15.</b>                             | <b>Presence of non-participants</b>                                                                                                                                                                                                 |
| 5  |                                        |                                                                                                                                                                                                                                     |
| 6  |                                        |                                                                                                                                                                                                                                     |
| 7  |                                        | <b>Was anyone else present besides the participants and researchers? (No)</b>                                                                                                                                                       |
| 8  |                                        |                                                                                                                                                                                                                                     |
| 9  | <b>16.</b>                             | <b>Description of sample</b>                                                                                                                                                                                                        |
| 10 |                                        | 51 PFAs and , 31 SCN staff, and 14 SCN leadership                                                                                                                                                                                   |
| 11 |                                        |                                                                                                                                                                                                                                     |
| 12 |                                        | <b>What are the important characteristics of the sample? e.g. demographic data, date (pg.9)</b>                                                                                                                                     |
| 13 |                                        |                                                                                                                                                                                                                                     |
| 14 | <b>Data collection</b>                 |                                                                                                                                                                                                                                     |
| 15 |                                        |                                                                                                                                                                                                                                     |
| 16 | <b>17.</b>                             | <b>Interview guide</b>                                                                                                                                                                                                              |
| 17 |                                        | interview guide was co-developed patient and family partners and research team members. Interview guide included in appendix                                                                                                        |
| 18 |                                        |                                                                                                                                                                                                                                     |
| 19 |                                        | <b>Were questions, prompts, guides provided by the authors? Was it pilot tested? (pg.6)</b>                                                                                                                                         |
| 20 |                                        |                                                                                                                                                                                                                                     |
| 21 | <b>18.</b>                             | <b>Repeat interviews</b>                                                                                                                                                                                                            |
| 22 |                                        |                                                                                                                                                                                                                                     |
| 23 |                                        | <b>Were repeat interviews carried out? If yes, how many? (no)</b>                                                                                                                                                                   |
| 24 |                                        |                                                                                                                                                                                                                                     |
| 25 | <b>19.</b>                             | <b>Audio/visual recording</b>                                                                                                                                                                                                       |
| 26 |                                        | yes                                                                                                                                                                                                                                 |
| 27 |                                        |                                                                                                                                                                                                                                     |
| 28 |                                        | <b>Did the research use audio or visual recording to collect the data? (pg.6)</b>                                                                                                                                                   |
| 29 |                                        |                                                                                                                                                                                                                                     |
| 30 | <b>20.</b>                             | <b>Field notes</b>                                                                                                                                                                                                                  |
| 31 |                                        |                                                                                                                                                                                                                                     |
| 32 |                                        | <b>Were field notes made during and/or after the interview or focus group? (yes)</b>                                                                                                                                                |
| 33 |                                        |                                                                                                                                                                                                                                     |
| 34 | <b>21.</b>                             | <b>Duration</b>                                                                                                                                                                                                                     |
| 35 |                                        | interviews ranged from 25 to 94 mins                                                                                                                                                                                                |
| 36 |                                        |                                                                                                                                                                                                                                     |
| 37 |                                        | <b>What was the duration of the interviews or focus group? (pg 9)</b>                                                                                                                                                               |
| 38 |                                        |                                                                                                                                                                                                                                     |
| 39 | <b>22.</b>                             | <b>Data saturation</b>                                                                                                                                                                                                              |
| 40 |                                        | (table 2 presents the full list of themes. From our analysis those were the themes identified and capture the experiences and views of our participants. We didn't identify new information when coding, and reviewing transcripts) |
| 41 |                                        |                                                                                                                                                                                                                                     |
| 42 |                                        | <b>Was data saturation discussed?</b>                                                                                                                                                                                               |
| 43 |                                        |                                                                                                                                                                                                                                     |
| 44 | <b>23.</b>                             | <b>Transcripts returned</b>                                                                                                                                                                                                         |
| 45 |                                        |                                                                                                                                                                                                                                     |
| 46 |                                        | <b>Were transcripts returned to participants for comment and/or correction? (no)</b>                                                                                                                                                |
| 47 |                                        |                                                                                                                                                                                                                                     |
| 48 |                                        |                                                                                                                                                                                                                                     |
| 49 |                                        |                                                                                                                                                                                                                                     |
| 50 | <b>Domain 3: analysis and findings</b> |                                                                                                                                                                                                                                     |
| 51 |                                        |                                                                                                                                                                                                                                     |
| 52 |                                        |                                                                                                                                                                                                                                     |
| 53 |                                        |                                                                                                                                                                                                                                     |
| 54 |                                        |                                                                                                                                                                                                                                     |
| 55 |                                        |                                                                                                                                                                                                                                     |
| 56 |                                        |                                                                                                                                                                                                                                     |
| 57 |                                        |                                                                                                                                                                                                                                     |
| 58 |                                        |                                                                                                                                                                                                                                     |
| 59 |                                        |                                                                                                                                                                                                                                     |
| 60 |                                        |                                                                                                                                                                                                                                     |

|                      |                                                                                                                                                                                                                        |                                                                                                                                                     |
|----------------------|------------------------------------------------------------------------------------------------------------------------------------------------------------------------------------------------------------------------|-----------------------------------------------------------------------------------------------------------------------------------------------------|
|                      | Qualitative researcher (SA) followed the six-step thematic analysis Braun & Clarke method,(21) and had peer debriefing sessions at different stages of the analysis with MS to discuss themes and subthemes identified |                                                                                                                                                     |
| <b>Data analysis</b> |                                                                                                                                                                                                                        |                                                                                                                                                     |
| 24.                  | <b>Number of data coders</b>                                                                                                                                                                                           | <b>How many data coders coded the data? (pg.6)</b>                                                                                                  |
| 25.                  | <b>Description of the coding tree</b>                                                                                                                                                                                  | <b>Did authors provide a description of the coding tree? (pg.6)</b>                                                                                 |
| 26.                  | <b>Derivation of themes</b><br>derived from the data using inductive and deductive coding strategies                                                                                                                   | <b>Were themes identified in advance or derived from the data? (pg.6)</b>                                                                           |
| 27.                  | <b>Software</b><br>Nvivo                                                                                                                                                                                               | <b>What software, if applicable, was used to manage the data? (pg.6)</b>                                                                            |
| 28.                  | <b>Participant checking</b><br>yes, through meetings with SCN teams and via round 3 of the consensus process                                                                                                           | <b>Did participants provide feedback on the findings? (pg.5)</b>                                                                                    |
| <b>Reporting</b>     |                                                                                                                                                                                                                        |                                                                                                                                                     |
| 29.                  | <b>Quotations presented</b><br>presented within table 2                                                                                                                                                                | <b>Were participant quotations presented to illustrate the themes / findings? Was each quotation identified? e.g. participant number (pg.13-16)</b> |
| 30.                  | <b>Data and findings consistent</b>                                                                                                                                                                                    | <b>Was there consistency between the data presented and the findings? (pg.10-16)</b>                                                                |
| 31.                  | <b>Clarity of major themes</b>                                                                                                                                                                                         | <b>Were major themes clearly presented in the findings? (pg.10-16)</b>                                                                              |
| 32.                  | <b>Clarity of minor themes</b><br>minor themes weren't identified, but rather sub themes                                                                                                                               | <b>Is there a description of diverse cases or discussion of minor themes? (pg.10-16)</b>                                                            |
