# Supplementary material for: Co-developing patient and family engagement indicators for health system improvement with healthcare system stakeholders: a consensus study
Source: PubMed Central journal article supplement — BMJ Open. 2023 Feb 2;13(2):e067609. doi: 10.1136/bmjopen-2022-067609 (PMC9896218; doi:10.1136/bmjopen-2022-067609), 2023-02-02
Supplement: bmjopen-2022-067609supp002.pdf [file bmjopen-2022-067609supp002.pdf]

**APPENDIX II- Patient and Family Engagement Indicators**

| <b>Indicator Name</b>                                                                                         | <b>Numerator</b>                                                                                                                                                                                | <b>Denominator</b>                                    |
|---------------------------------------------------------------------------------------------------------------|-------------------------------------------------------------------------------------------------------------------------------------------------------------------------------------------------|-------------------------------------------------------|
| 1. Enough information about the role                                                                          | Number of PFAs who responded agree or strongly agree to having enough information about their role                                                                                              | Total number of PFAs responding to this question      |
| 2. Clear understanding of the purpose of the SCN that I am a part of                                          | Number of PFAs who responded agree or strongly agree to having a clear understanding of the purpose of the SCN they are a part of                                                               | Total number of PFAs responding to this question      |
| 3. Able to express views freely                                                                               | Number of PFAs who responded agree or strongly agree to being able to express their views freely                                                                                                | Total number of PFAs responding to this question      |
| 4. PFAs have supports available for engagement                                                                | Number of PFAs who responded agree or strongly agree to having supports (i.e. technology, travel) available for engagement                                                                      | Total number of PFAs responding to this question      |
| 5. AHS Resources for Patient Engagement are useful for partnering with patient and family advisors (for PFAs) | Number of PFAs who responded agree or strongly agree that AHS resources* for partnering with patient and family advisors are useful<br>* AHS Guidebook for engaging patient and family advisors | Total number of PFAs responding to this question      |
| 6. Involvement of PFAs make a difference in the work of SCNs (answered by PFAs)                               | Number of PFAs who responded agree or strongly agree to the statement that involvement of PFAs make a difference in the work of SCNs                                                            | Total number of PFAs responding to this question      |
| 7. Involvement of PFAs make a difference in the work of SCNs (answered by SCN staff)                          | Number of SCN staff who responded agree or strongly agree to the statement that involvement of PFAs make a difference in the work of SCNs                                                       | Total number of SCN staff responding to this question |
| 8. SCNs take the feedback provided by PFAs into consideration (answered by PFAs)                              | Number of PFAs who responded agree or strongly agree to the statement that SCNs take the feedback provided by PFAs into consideration                                                           | Total number of PFAs responding to this question      |
| 9. SCNs take the feedback provided by PFAs into consideration (answered by SCN staff)                         | Number of SCN staff who responded agree or strongly agree to the statement that SCNs take the feedback provided by PFAs into consideration                                                      | Total number of SCN staff responding to this question |
| 10. Individuals engaging in SCN teams represent a                                                             | Number of PFAs who responded agree or strongly agree that individuals engaging in the                                                                                                           | Total number of PFAs responding to this question      |

|                                                                                                                                     |                                                                                                                                                                                                                              |                                                       |
|-------------------------------------------------------------------------------------------------------------------------------------|------------------------------------------------------------------------------------------------------------------------------------------------------------------------------------------------------------------------------|-------------------------------------------------------|
| broad range of perspectives (answered by PFAs)                                                                                      | SCN teams represent a broad range of perspectives                                                                                                                                                                            |                                                       |
| 11. Individuals engaging in SCN teams represent a broad range of perspectives (answered by SCN staff)                               | Number of SCN staff who responded agree or strongly agree that individuals engaging in the SCN teams represent a broad range of perspectives                                                                                 | Total number of SCN staff responding to this question |
| 12. Individuals engaging in SCN teams perceive the engagement as respectful and sincere to working together (answered by PFAs)      | Number of PFAs who responded agree or strongly agree that the engagement was respectful and sincere to working together                                                                                                      | Total number of PFAs responding to this question      |
| 13. Individuals engaging in SCN teams perceive the engagement as respectful and sincere to working together (answered by SCN Staff) | Number of SCN staff who responded agree or strongly agree that the engagement was respectful and sincere to working together                                                                                                 | Total number of SCN staff responding to this question |
| 14. PFAs work together with SCN staff to design SCN projects                                                                        | Number of PFAs who responded agree or strongly agree that they work together with SCN staff to design SCN projects (e.g. in priority setting & planning, development of proposals)                                           | Total number of PFAs responding to this question      |
| 15. SCN staff work together with PFAs to design SCN projects                                                                        | Number of SCN staff who responded agree or strongly agree that they work together with PFAs to design SCN projects (e.g. in priority setting & planning, development of proposals)                                           | Total number of SCN staff responding to this question |
| 16. PFAs work together with SCN staff to conduct SCN projects                                                                       | Number of PFAs who responded agree or strongly agree that they work together with SCN staff to conduct SCN projects (e.g. collaborate in data collection, analysis/interpretation, advising on project as it is carried out) | Total number of PFAs responding to this question      |
| 17. SCN staff work together with PFAs to conduct SCN projects                                                                       | Number of SCN staff who responded agree or strongly agree that they work together with PFAs to conduct SCN projects (e.g.                                                                                                    | Total number of SCN staff responding to this question |

|                                                                   |                                                                                                                                                                                  |                                                  |
|-------------------------------------------------------------------|----------------------------------------------------------------------------------------------------------------------------------------------------------------------------------|--------------------------------------------------|
|                                                                   | collaborate in data collection, analysis/interpretation, advising on project as it is carried out)                                                                               |                                                  |
| 18. PFAs work together with SCN staff to disseminate SCN projects | Number of PFAs who responded agree or strongly agree that they work together with SCN staff to disseminate SCN projects (e.g. co-presenting at conferences, sharing work widely) | Total number of PFAs responding to this question |

**Discarded Indicators from Round 2**

| Indicator                                                                                                              | Comments from panelists                                                                                                                                        |
|------------------------------------------------------------------------------------------------------------------------|----------------------------------------------------------------------------------------------------------------------------------------------------------------|
| 1. PFAs being meaningfully engaged virtually                                                                           | Different concepts – meaningful engagement & virtual, difficult to measure & action<br>Group suggestion: incorporate this indicator into others already listed |
| 2. PFAs have a supportive working environment to contribute to the engagement initiative                               | Repetitive indicator, and confusion regarding how supportive working environment is defined                                                                    |
| 3. SCNs have mentorship opportunities for PFAs                                                                         | Confusion regarding who the mentor would be, could be incorporated in another indicator                                                                        |
| 4. Each SCN has an explicit strategy or framework for patient engagement                                               | Seems more like a policy than an indicator doesn't need to be an indicator that is surveying staff                                                             |
| 5. Each SCN is at the stage of established/making some progress in engagement with patient and family advisors         | Wording is confusing and hard to understand                                                                                                                    |
| 6. Each SCN has explicit strategies for recruiting patient and family advisors, depending on the engagement initiative | More policy related, and not informing what needs to be improved                                                                                               |
| 7. There are resources (documents, guidelines) available to SCN Staff for PFA engagement                               | Redundant                                                                                                                                                      |
| 8. Each SCN prepares reports that summarize the contributions from patient and family advisor engagement initiatives   | Discarded in round 1 (Median rating on overall importance was 5)                                                                                               |
| 9. The SCN is achieving its stated objectives                                                                          | Too broad and difficult to measure<br>Would need to clarify what the objectives are                                                                            |
